# Supplementary material
Source: PubMed Central journal article supplement (PMC6663628)

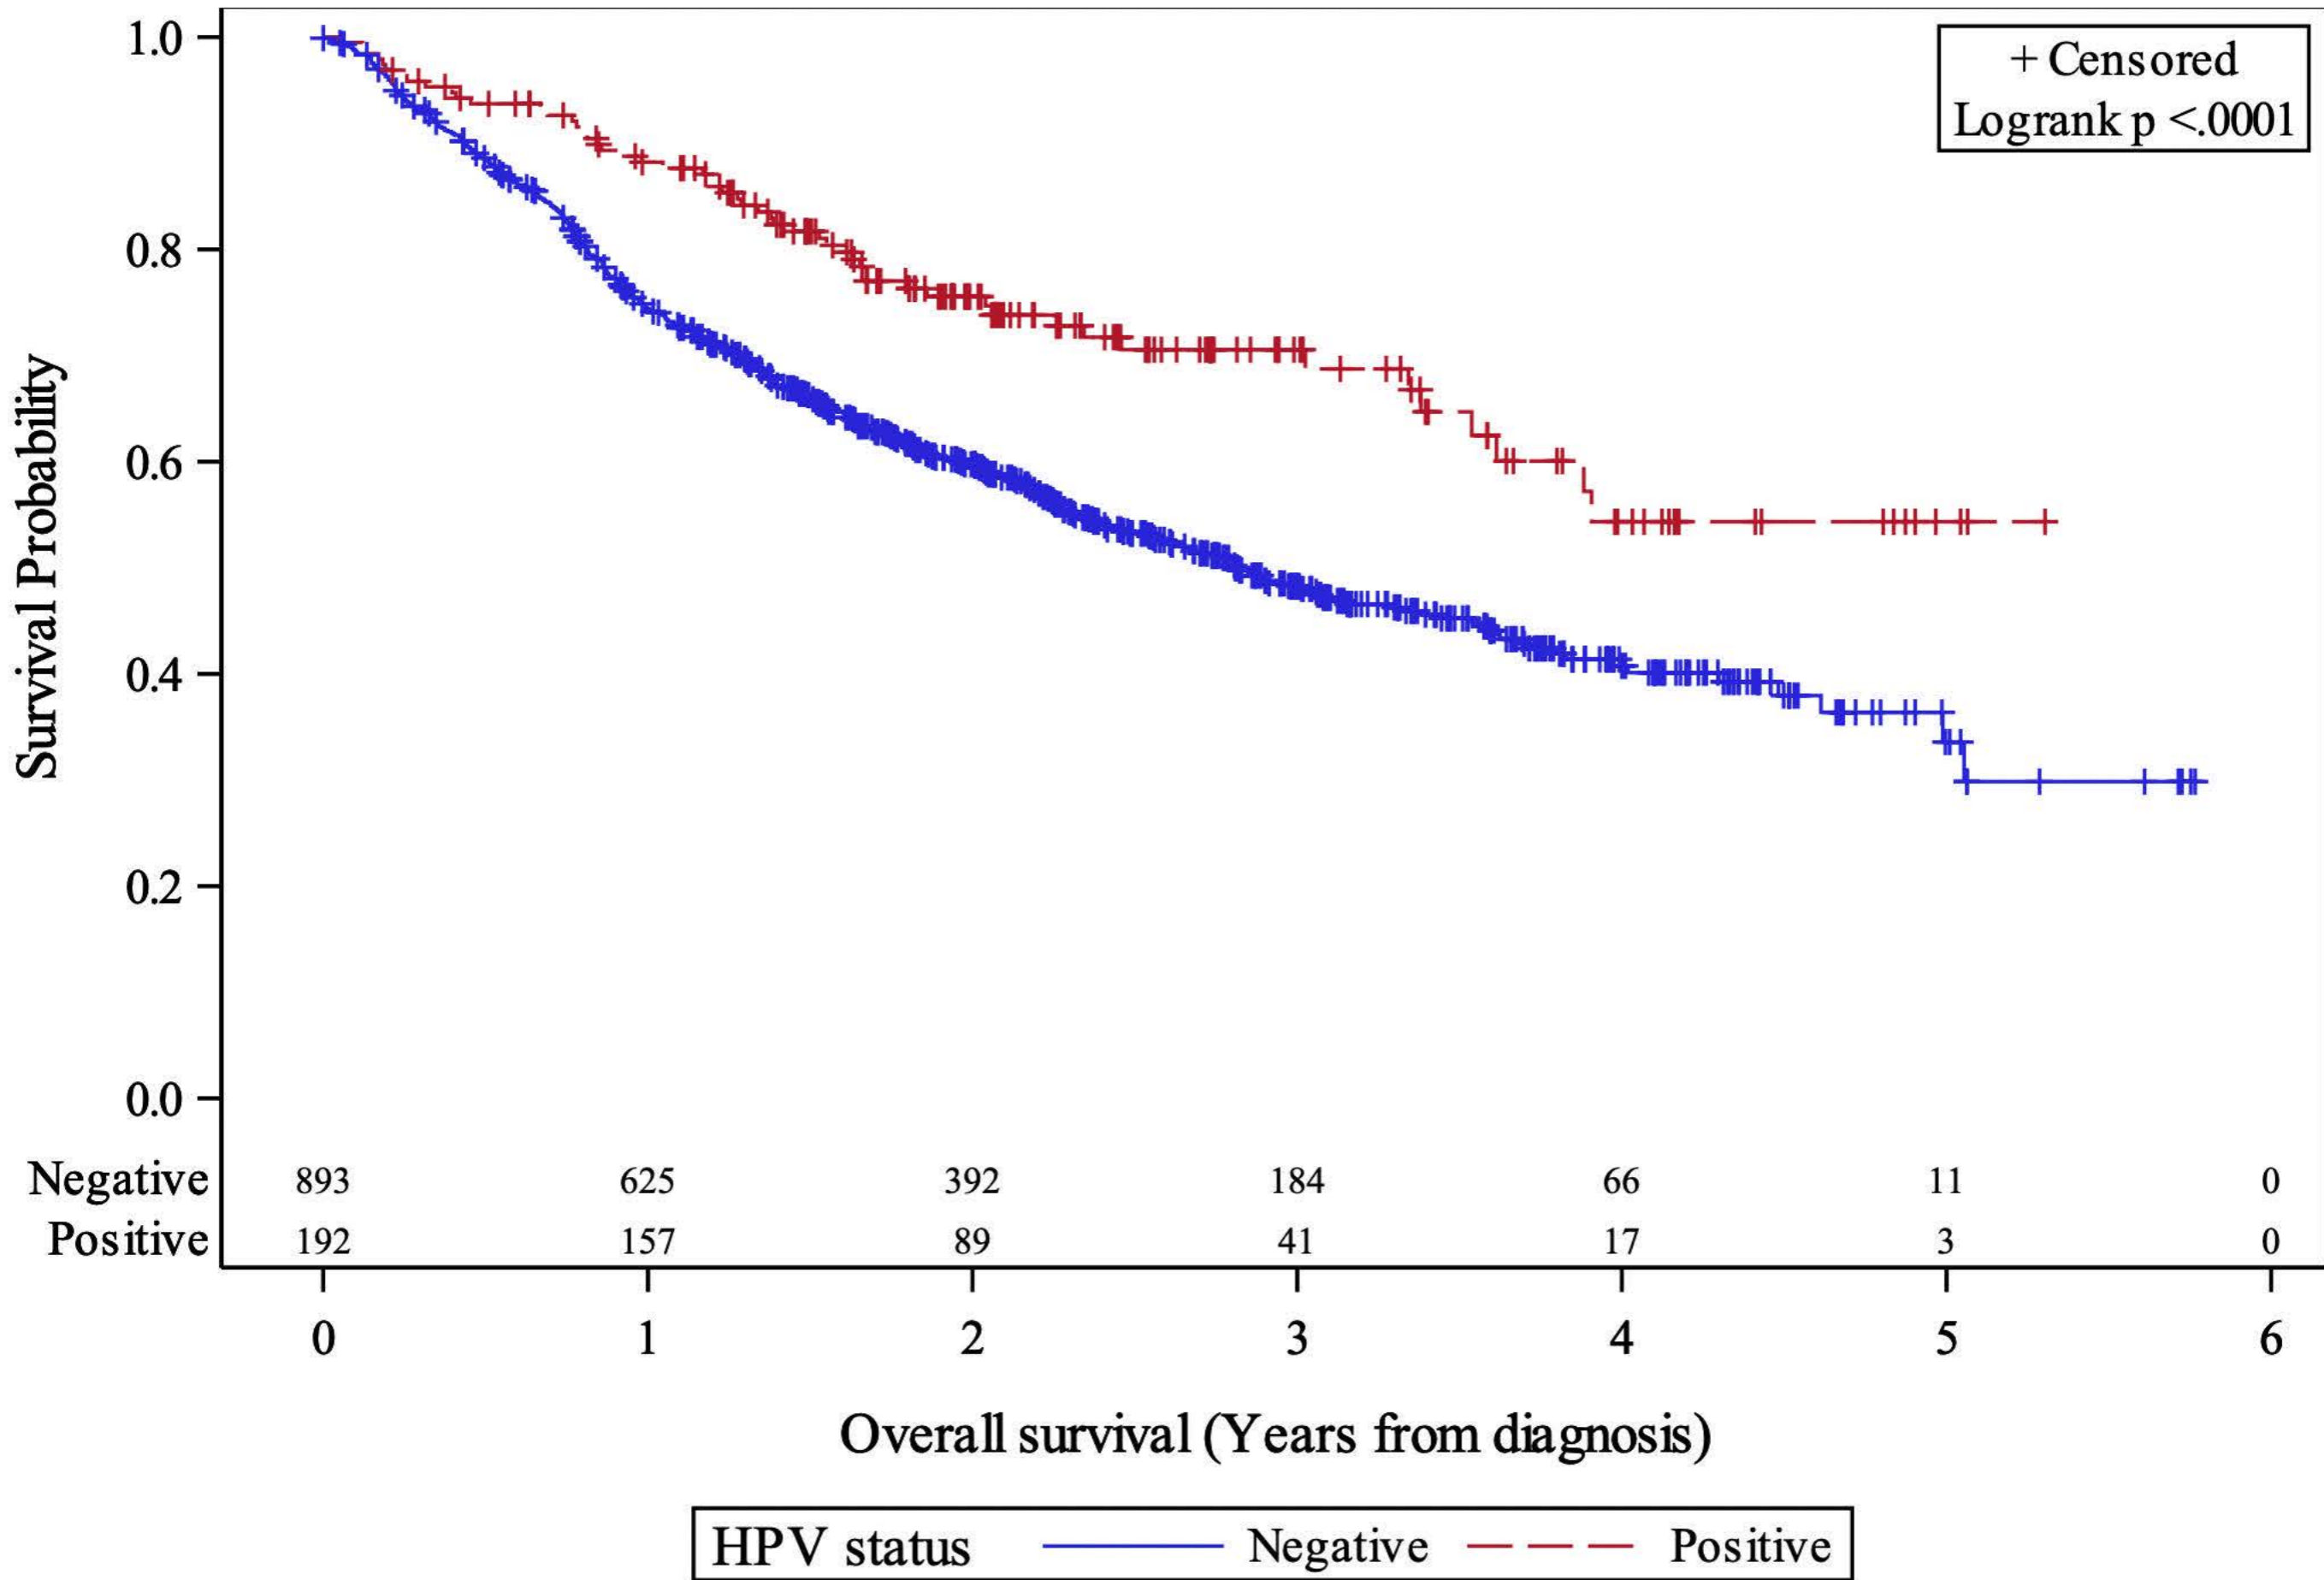

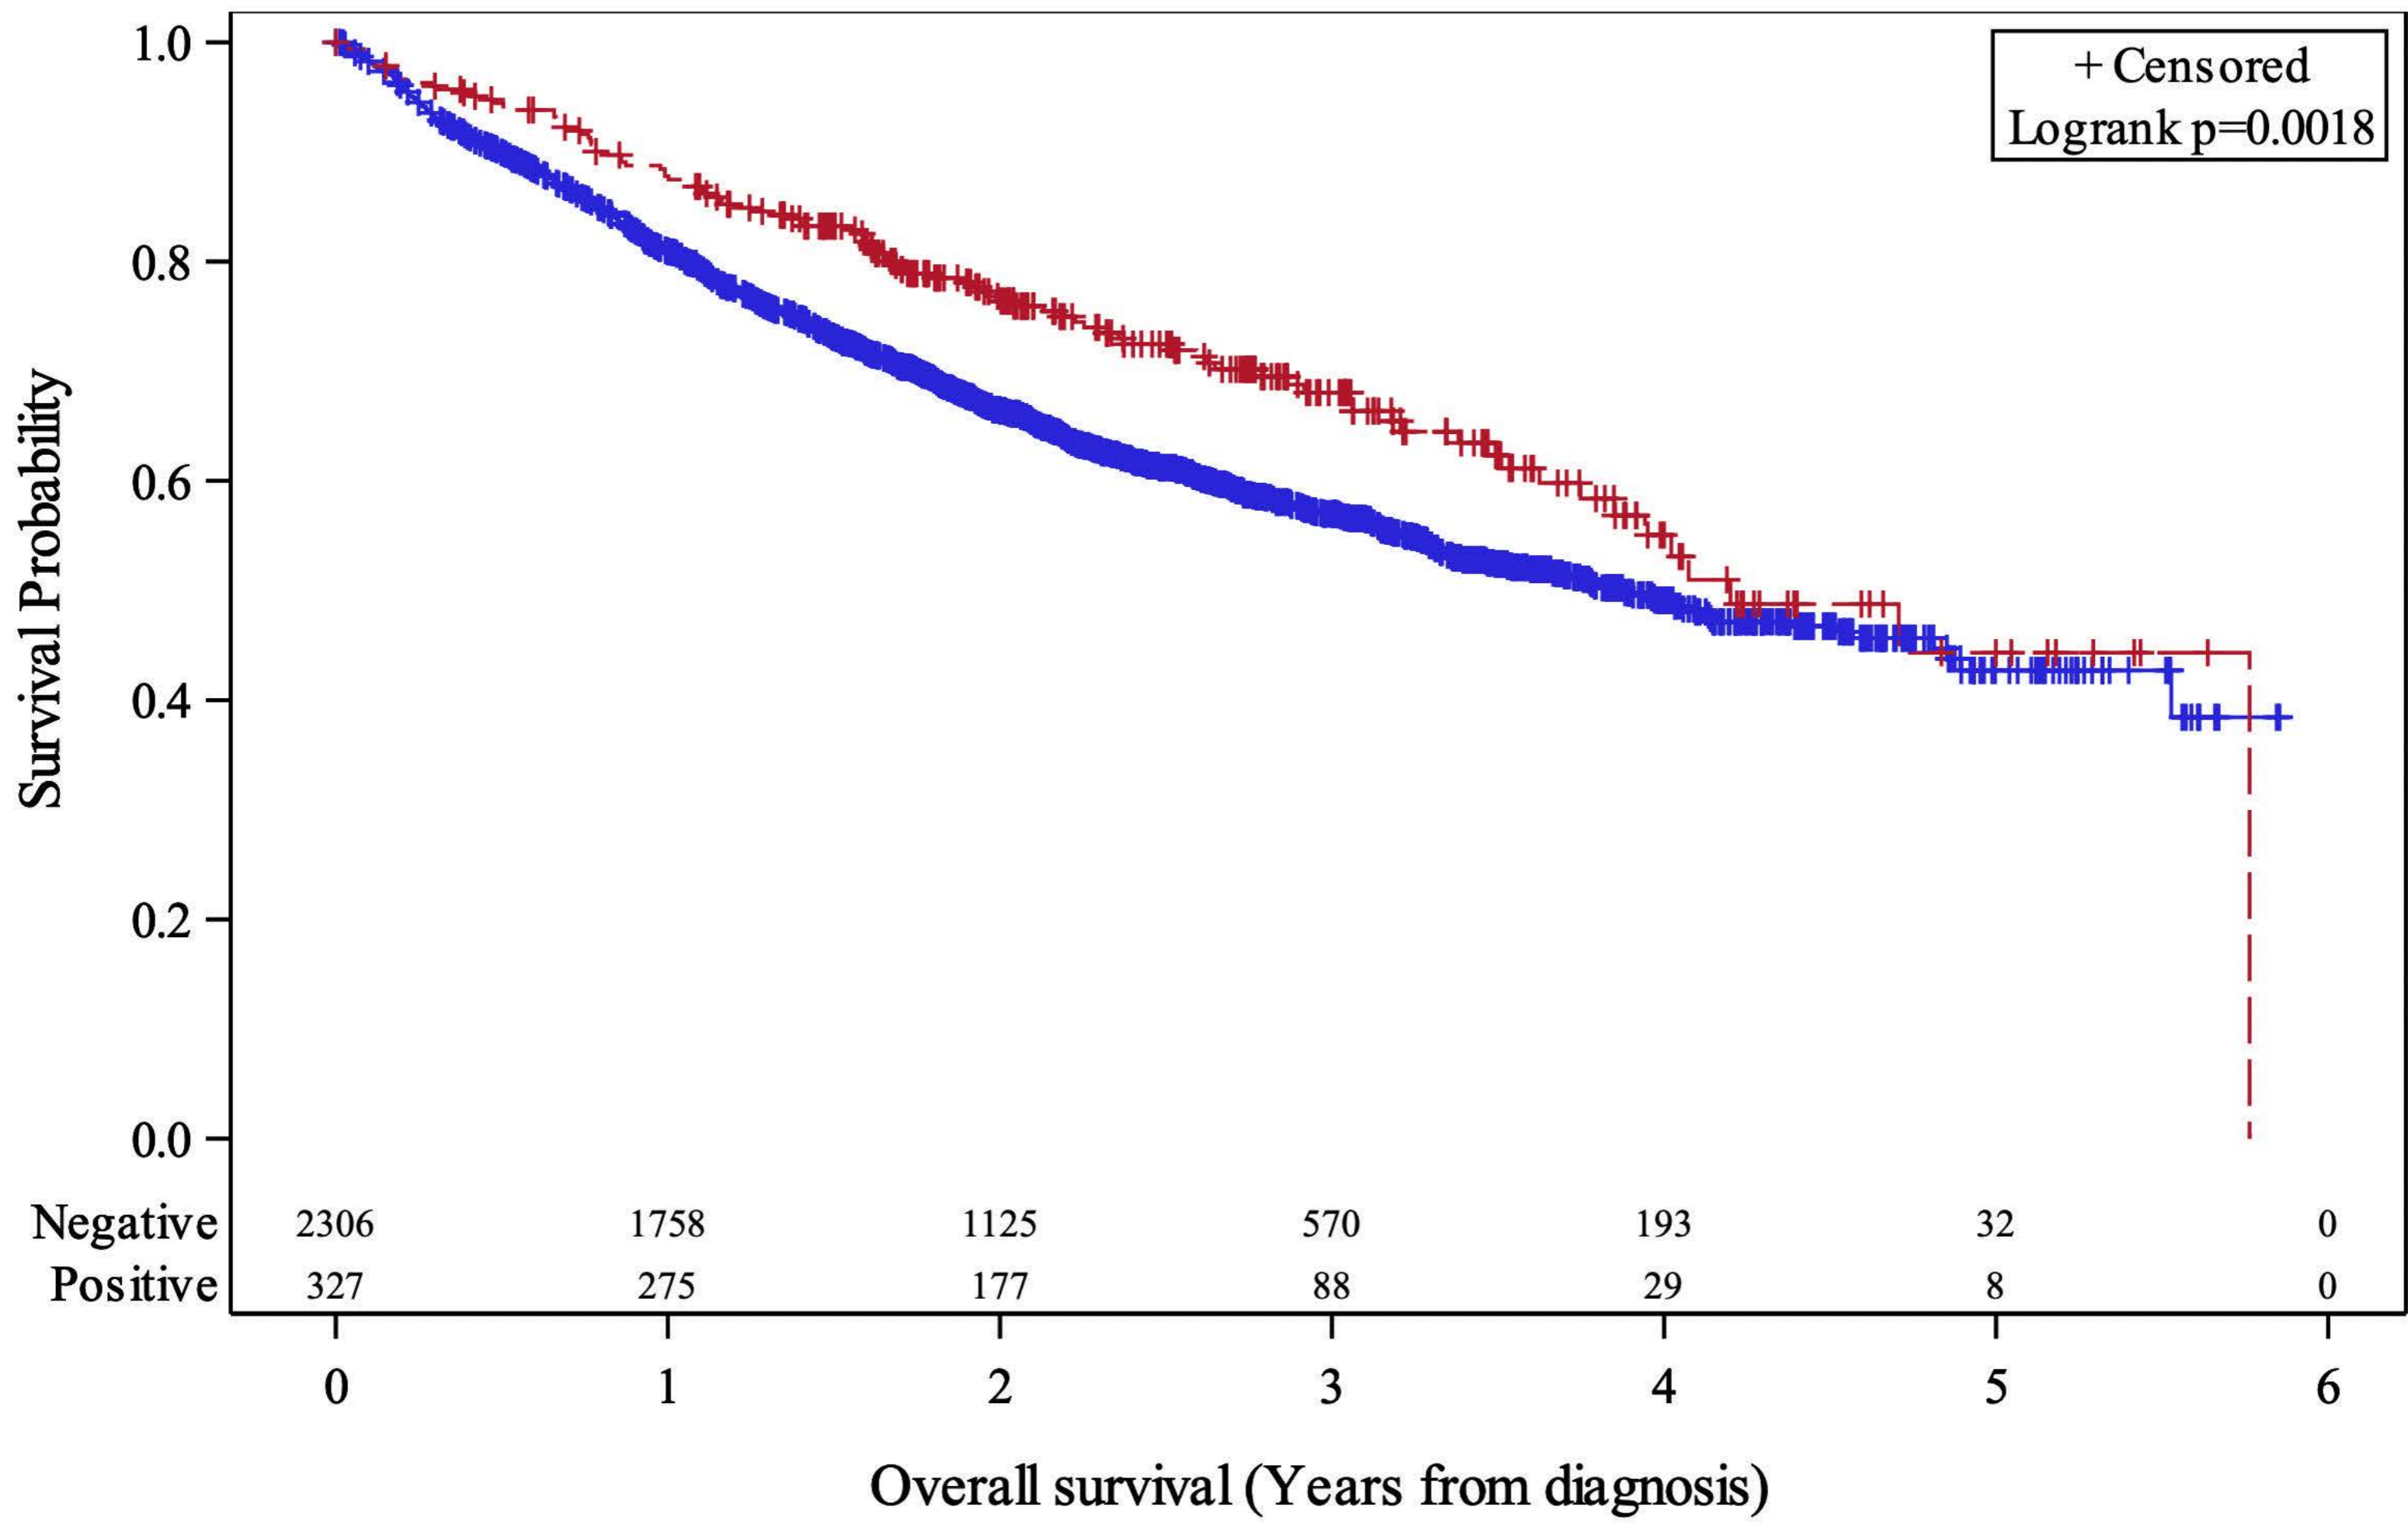

Survival Probability

Overall survival (Years from diagnosis)

HPV status ——— Negative - - - - Positive

+ Censored  
Logrank p=0.0018

Negative  
Positive

|      |      |      |     |     |    |   |
|------|------|------|-----|-----|----|---|
| 2306 | 1758 | 1125 | 570 | 193 | 32 | 0 |
| 327  | 275  | 177  | 88  | 29  | 8  | 0 |

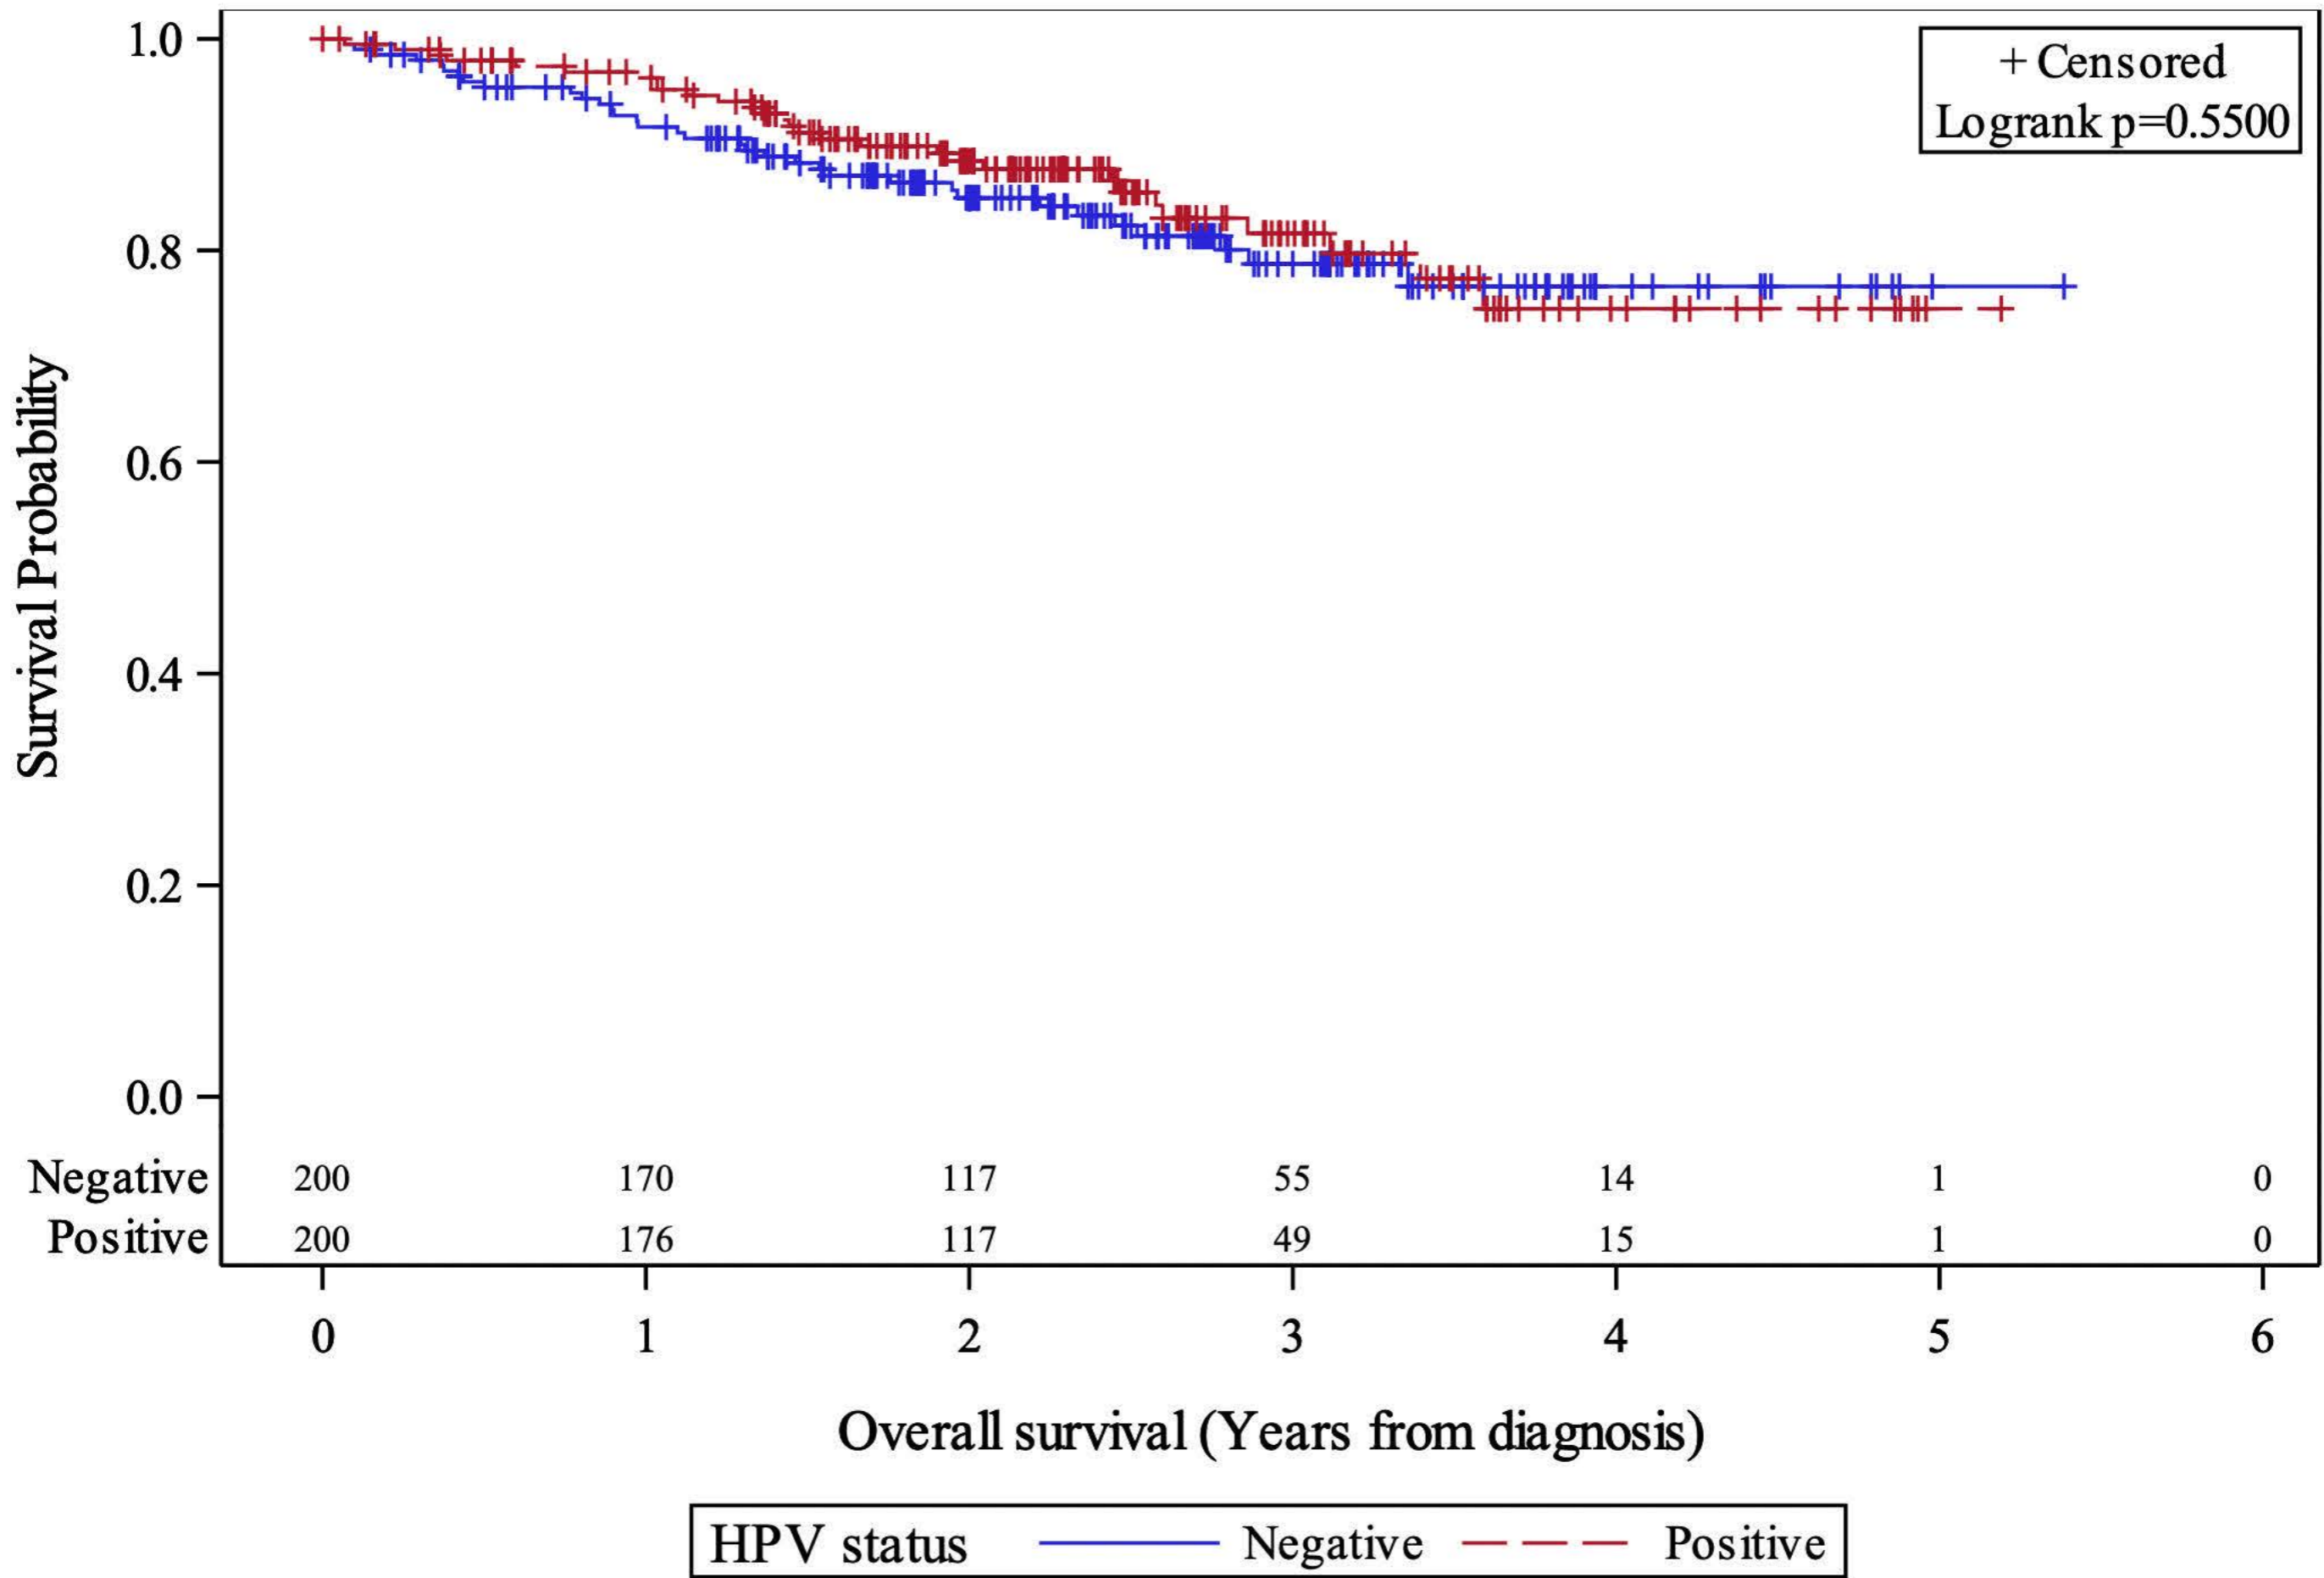

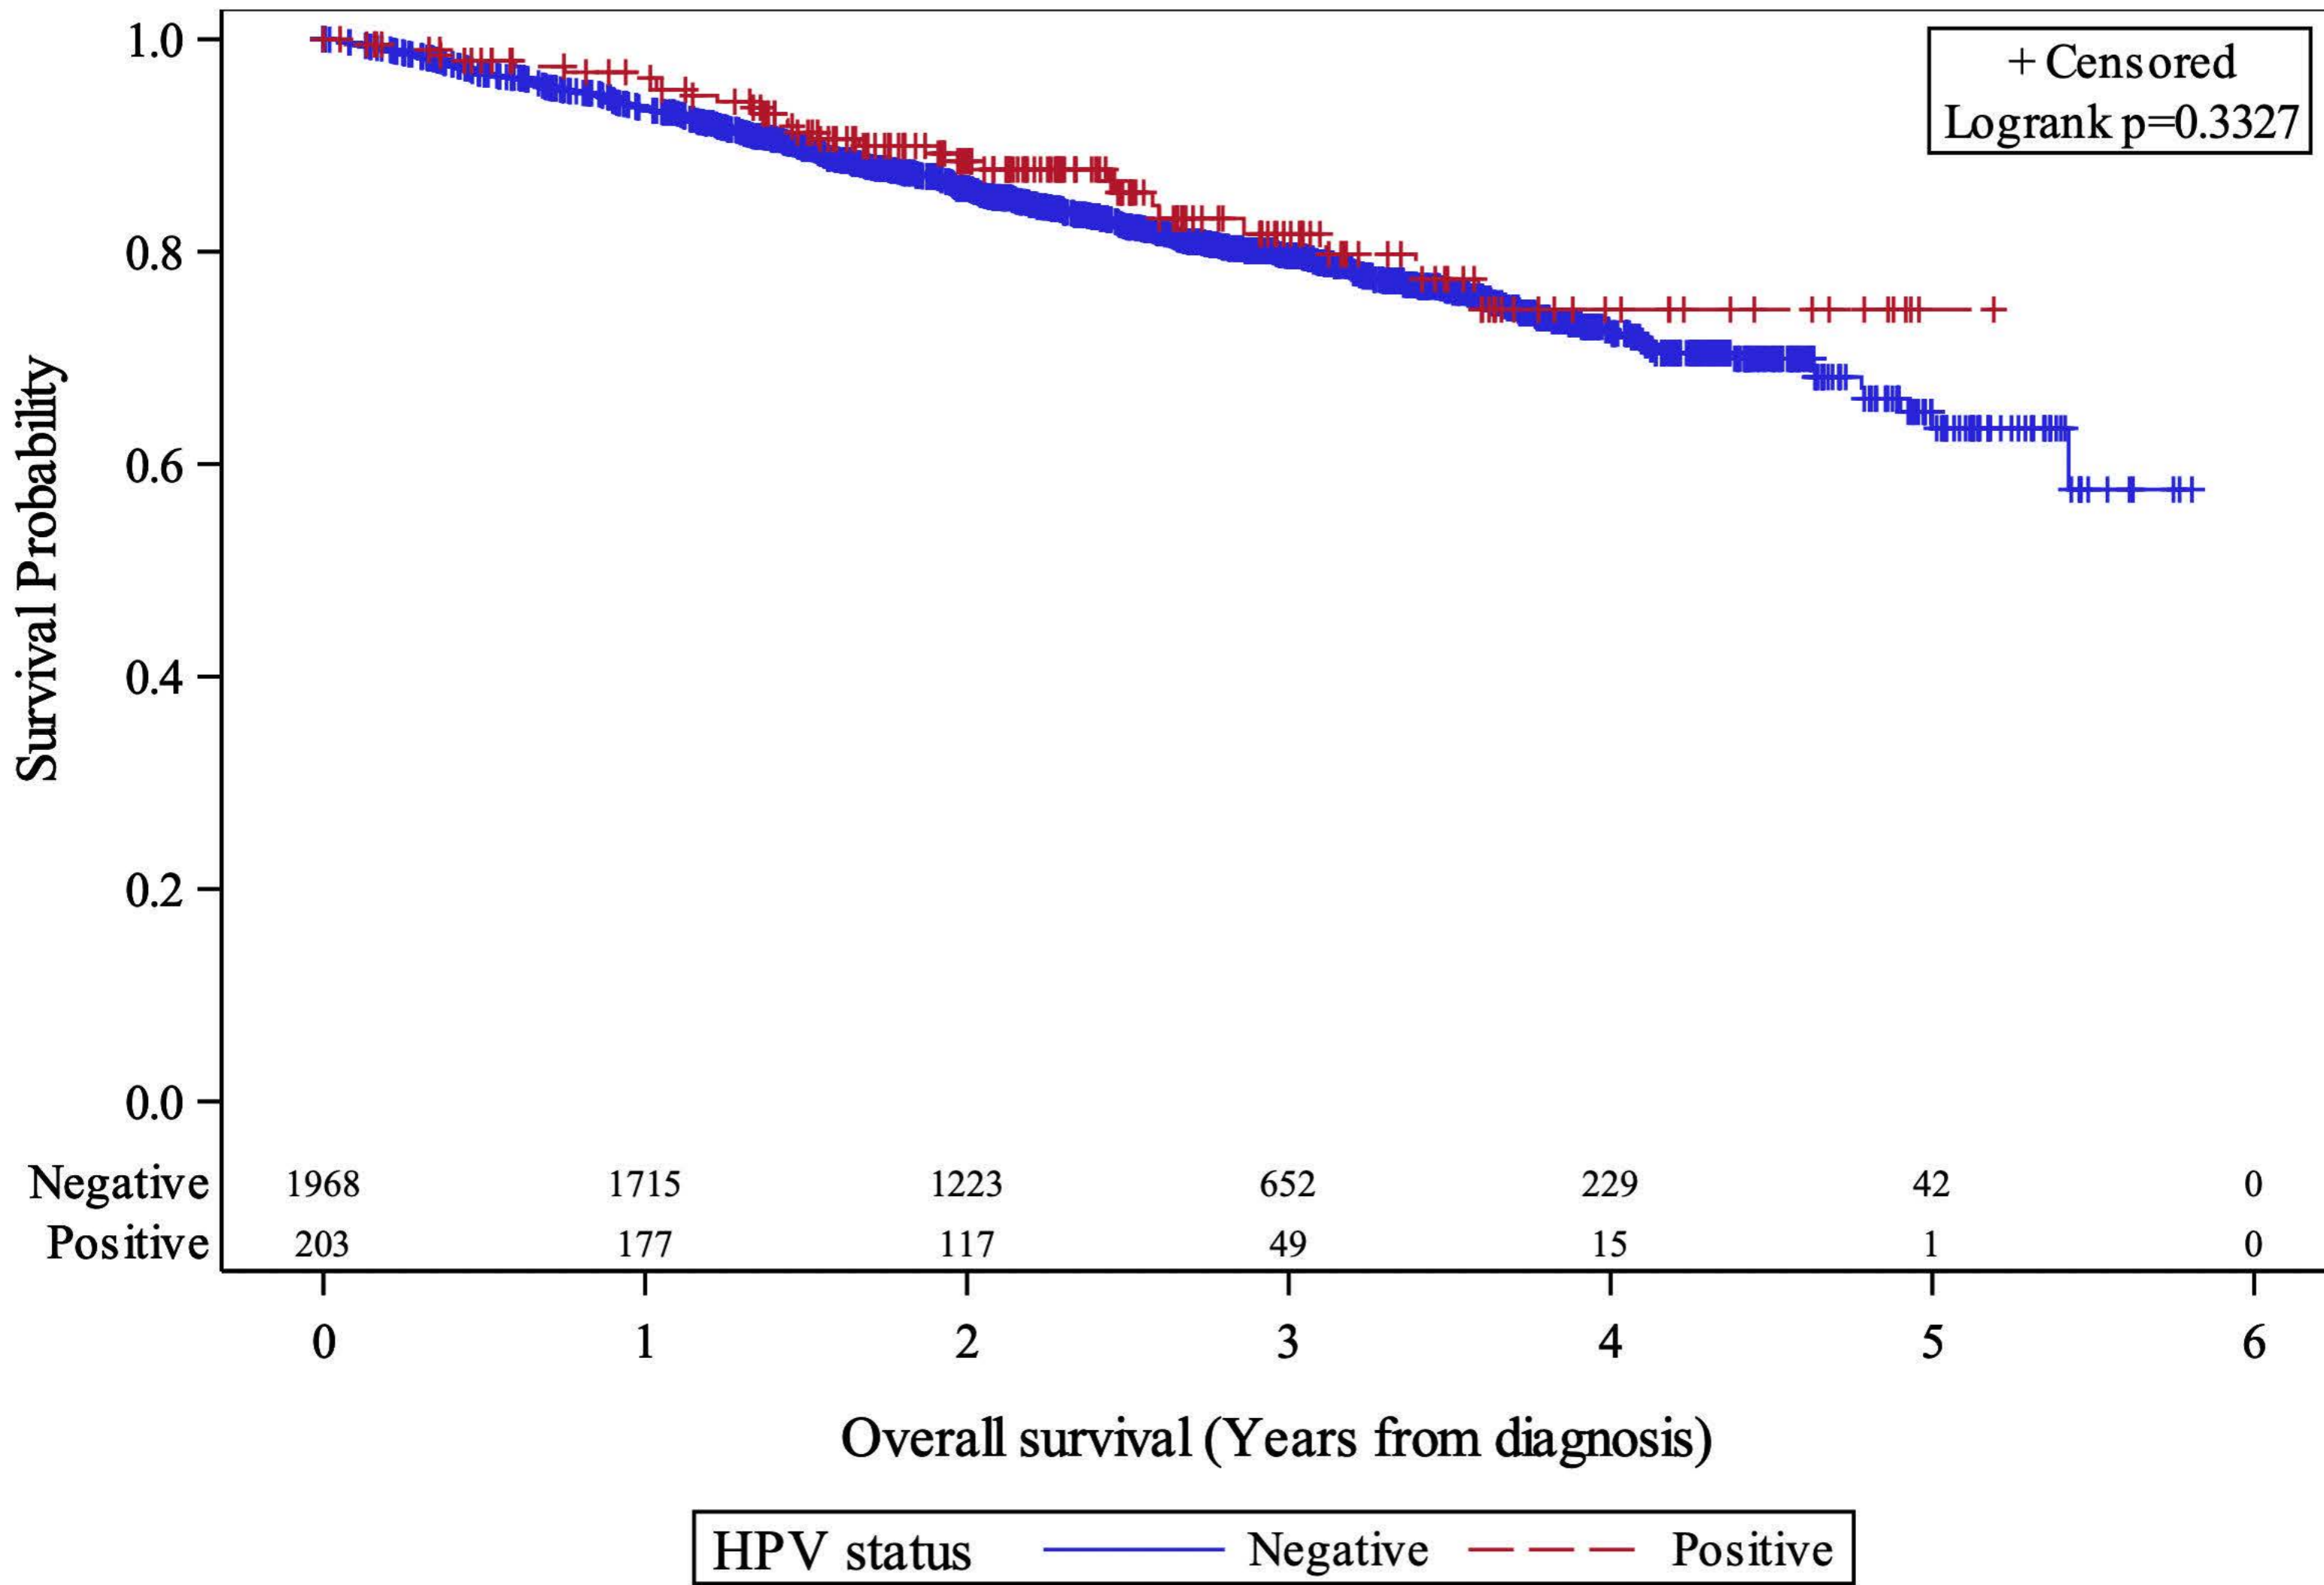

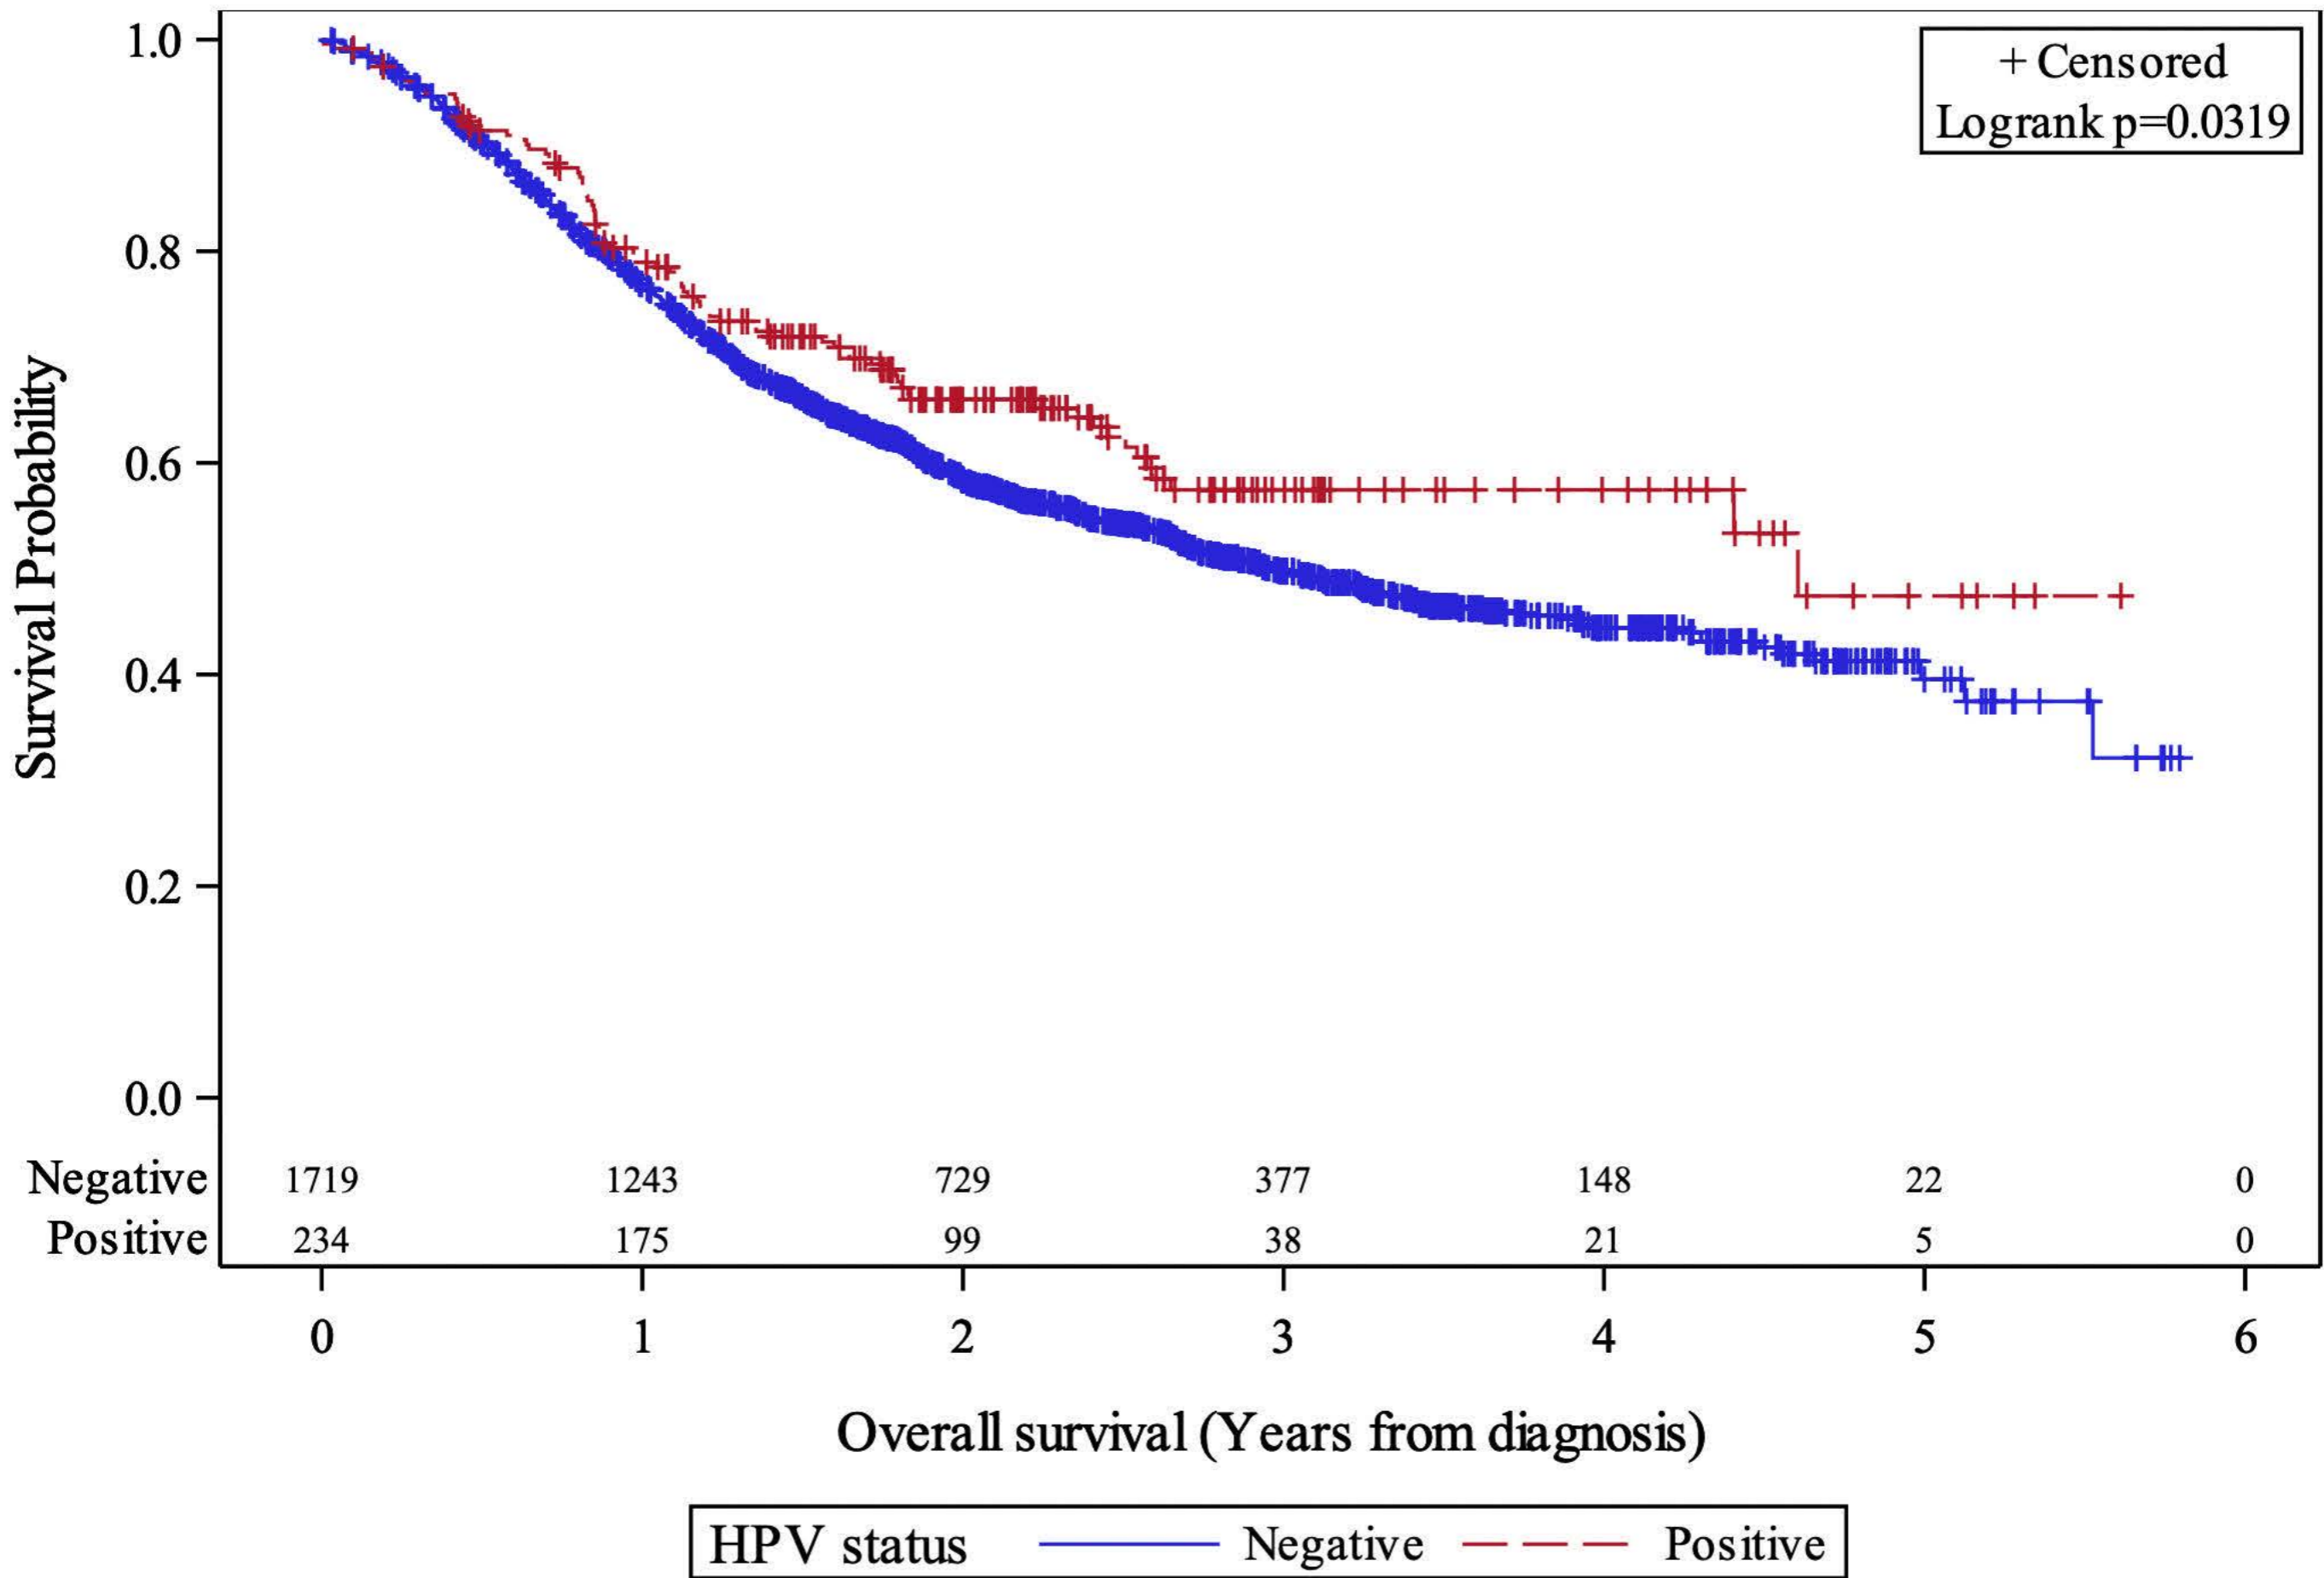



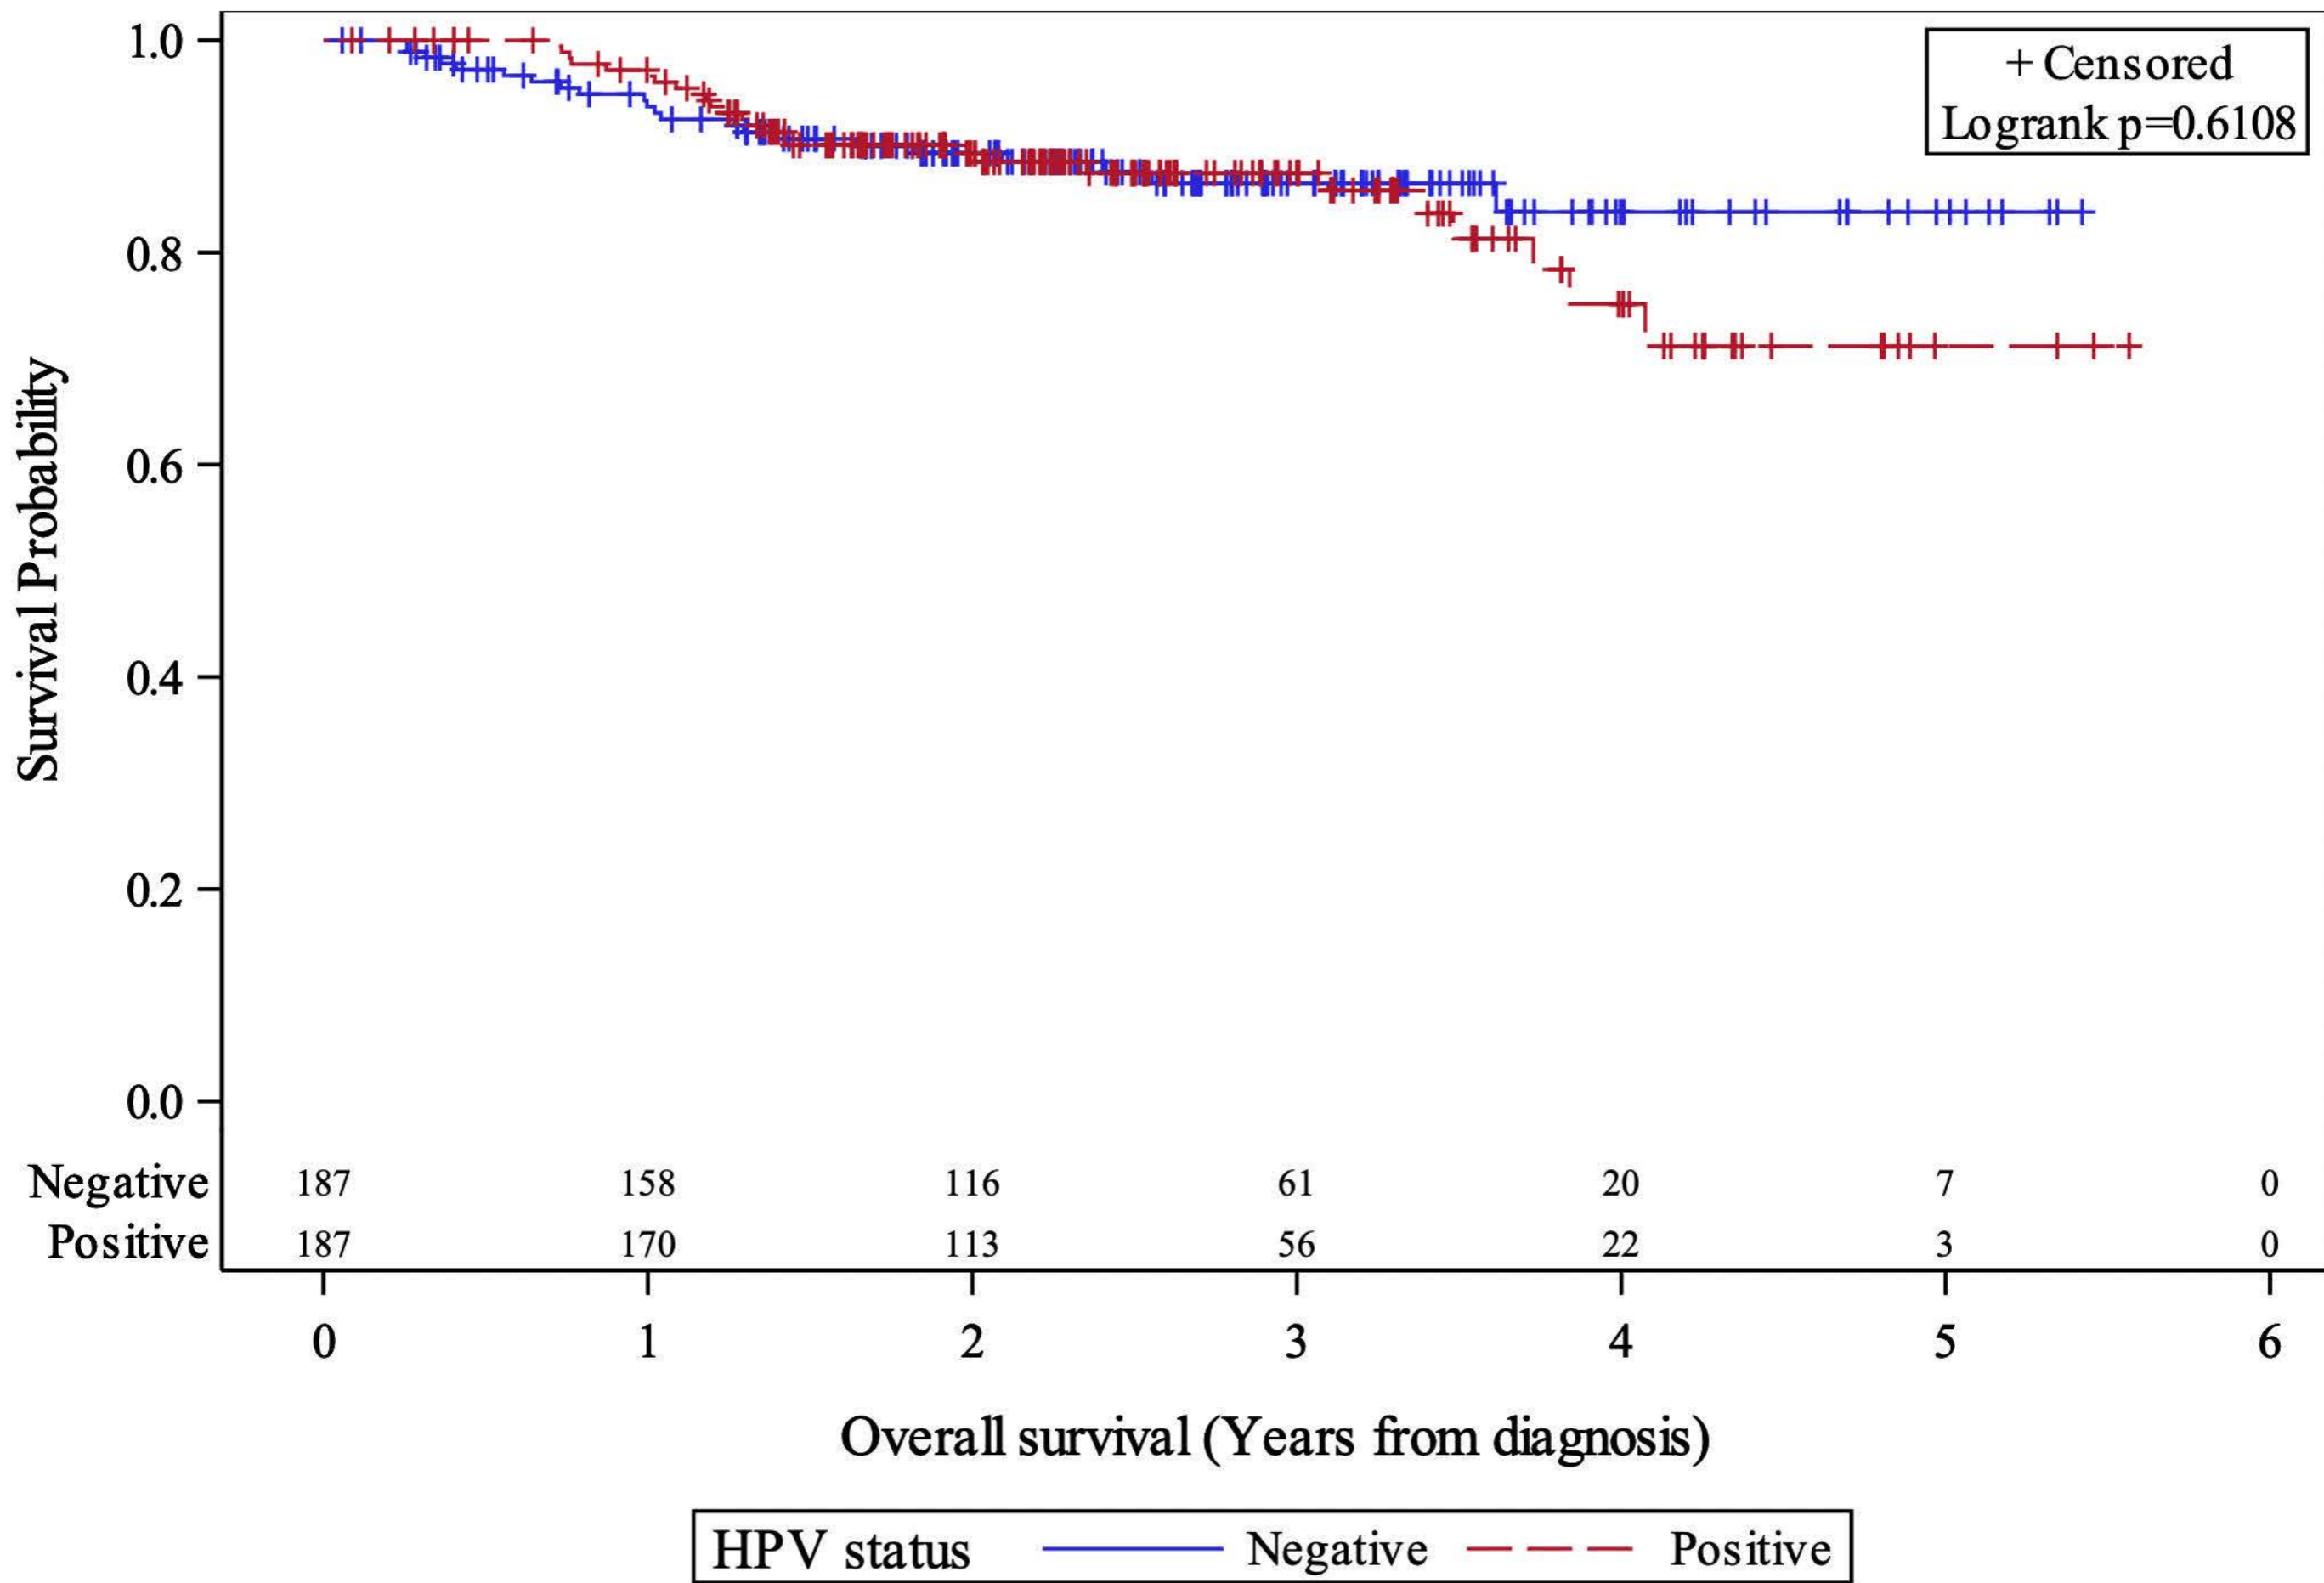

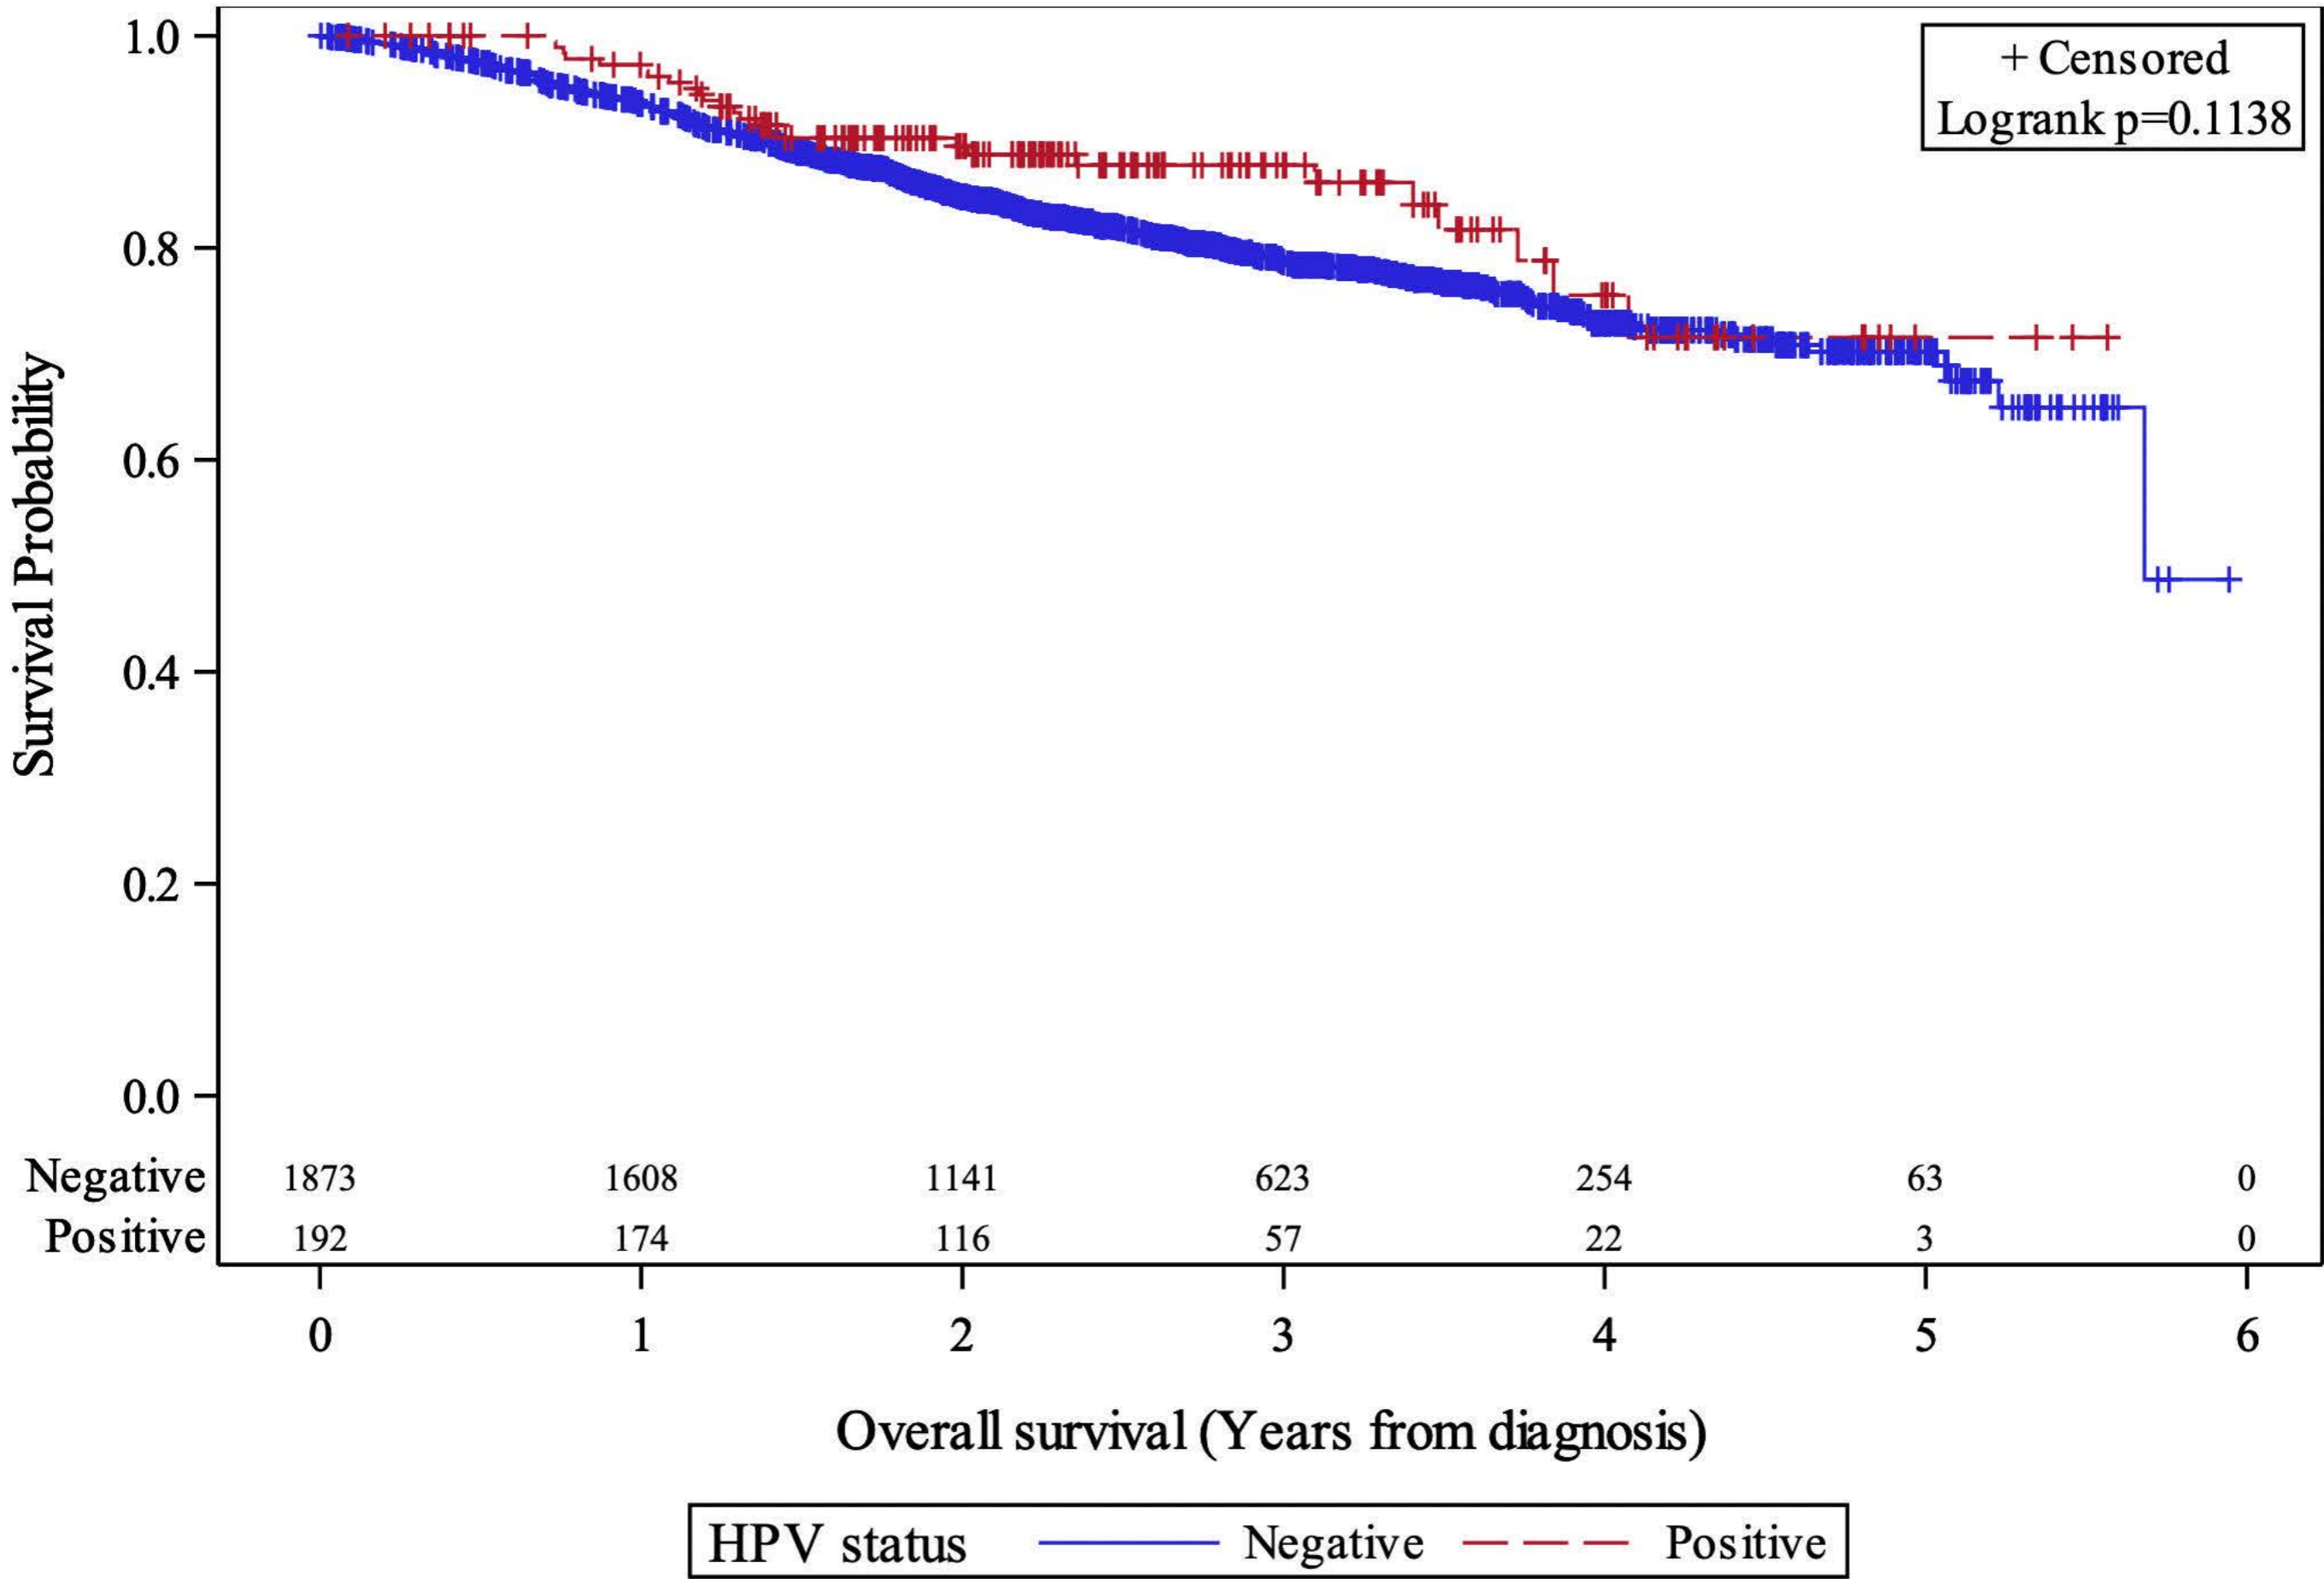

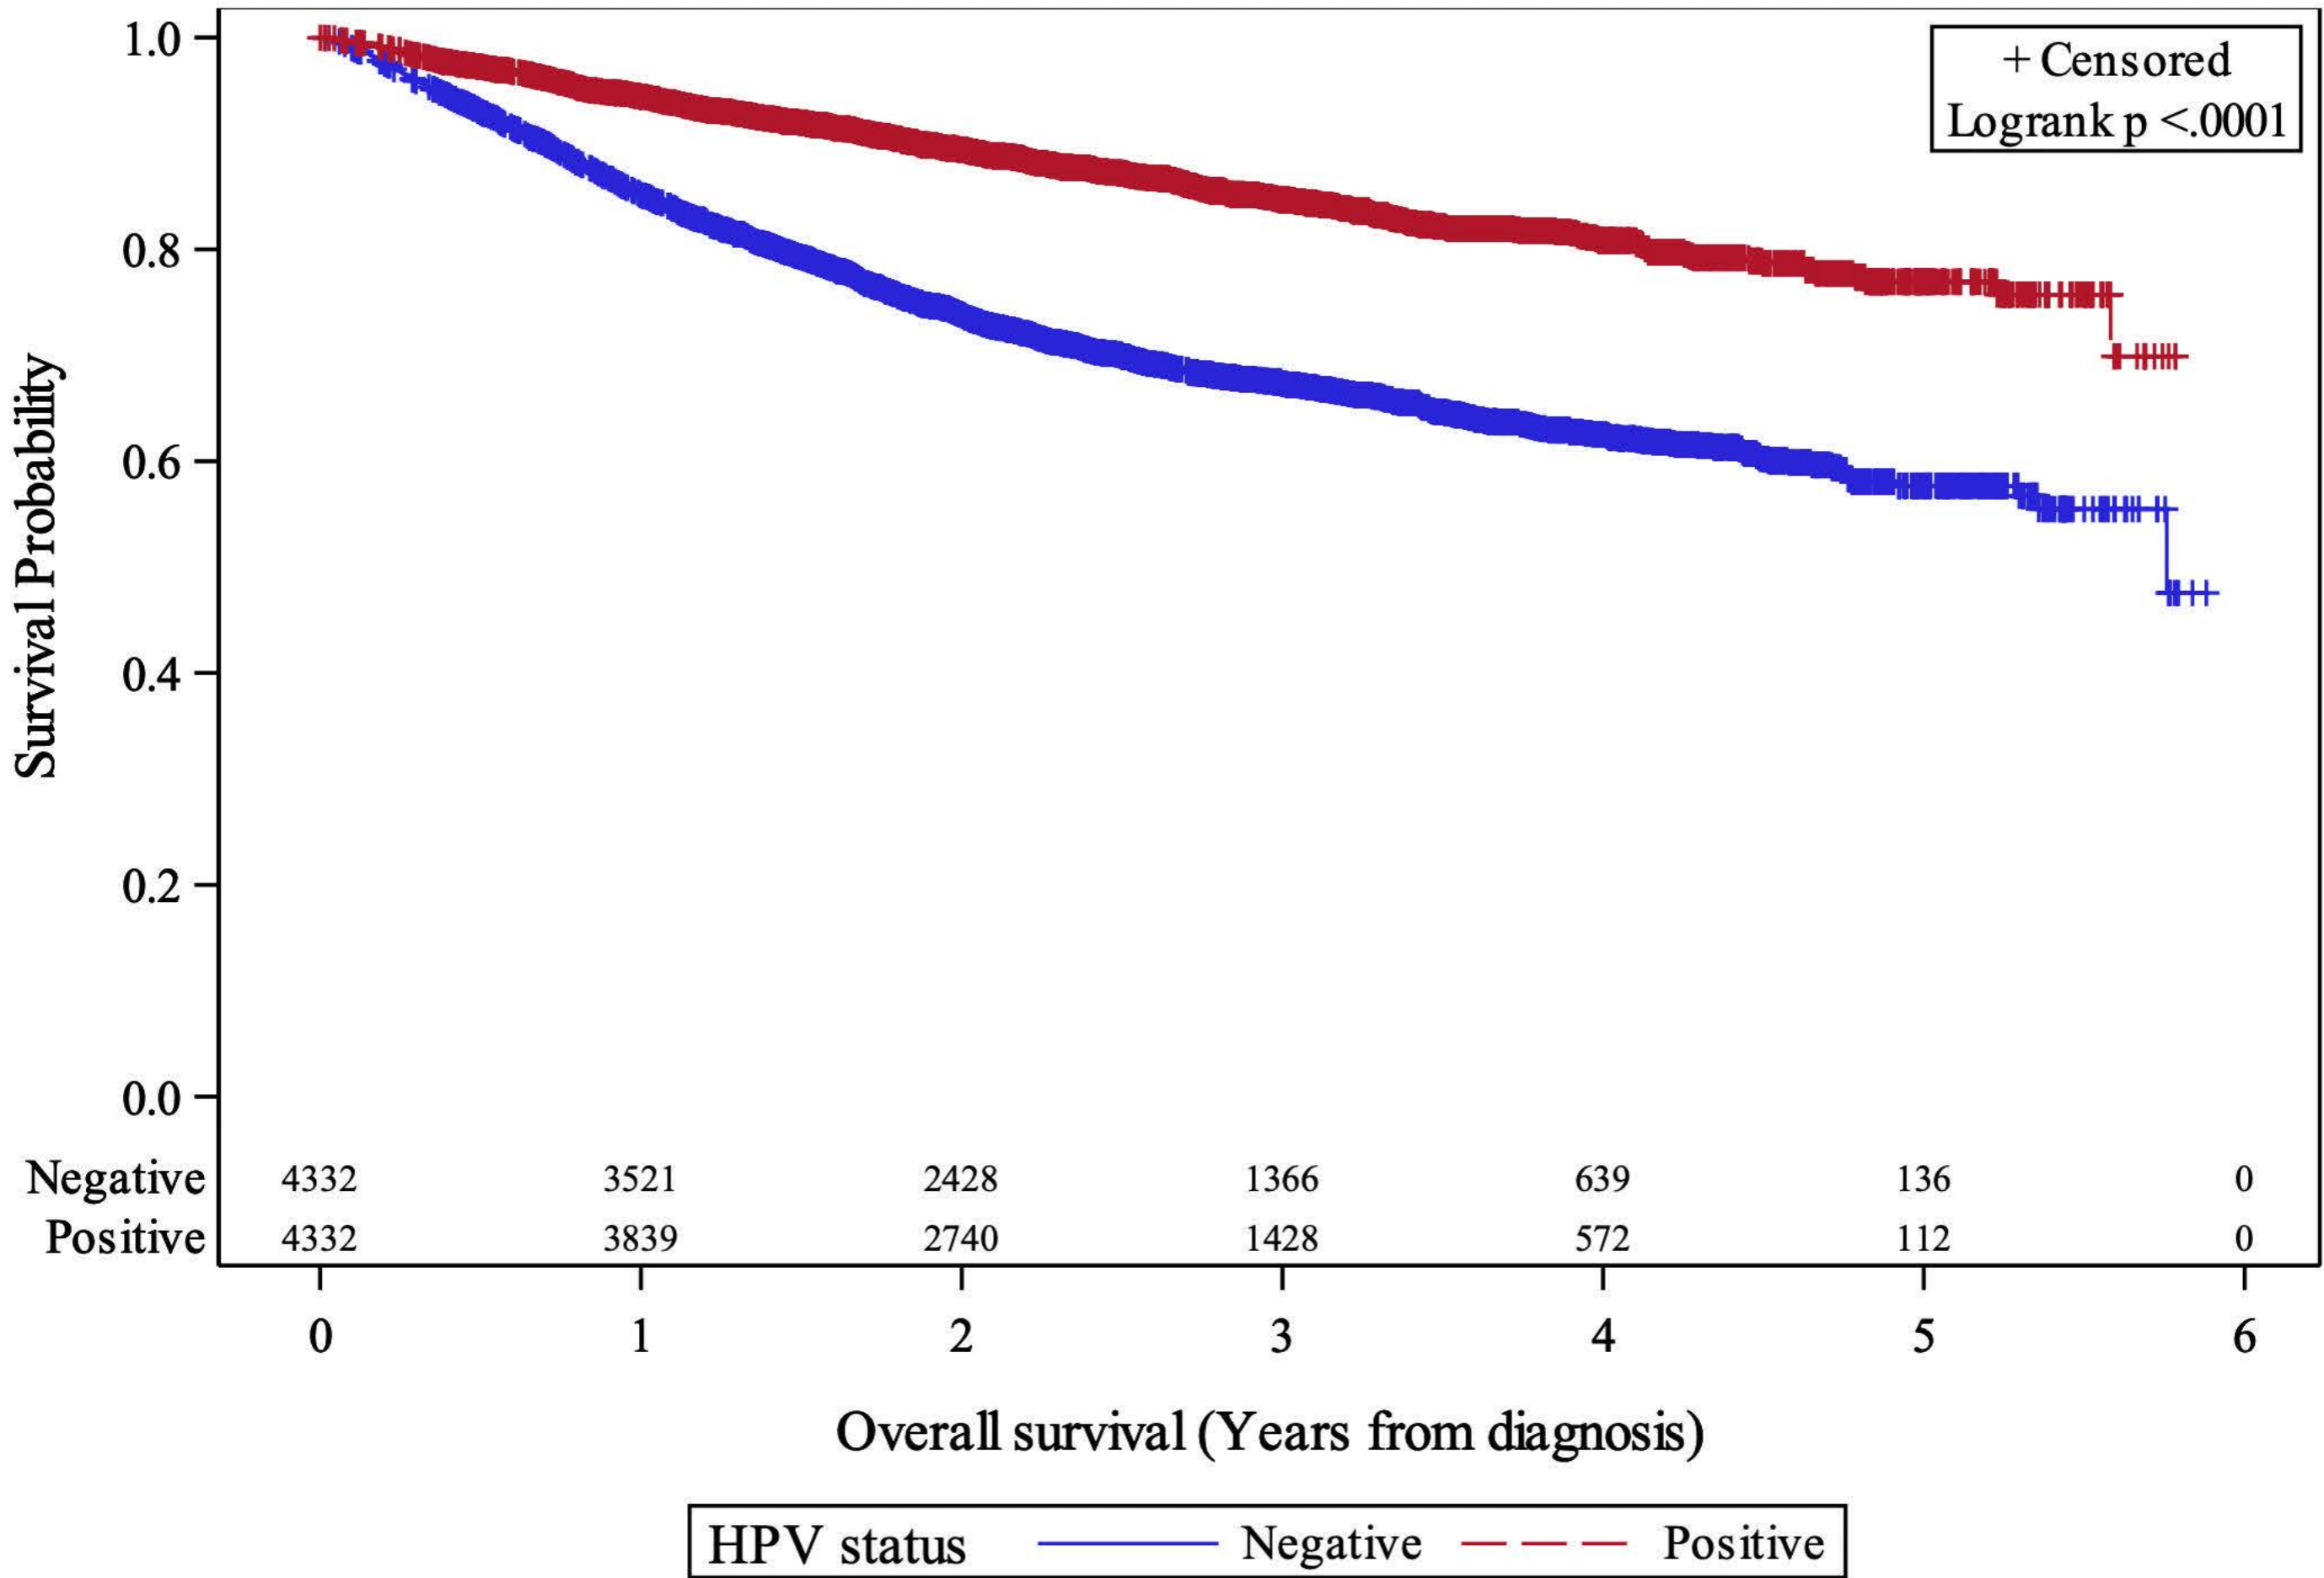



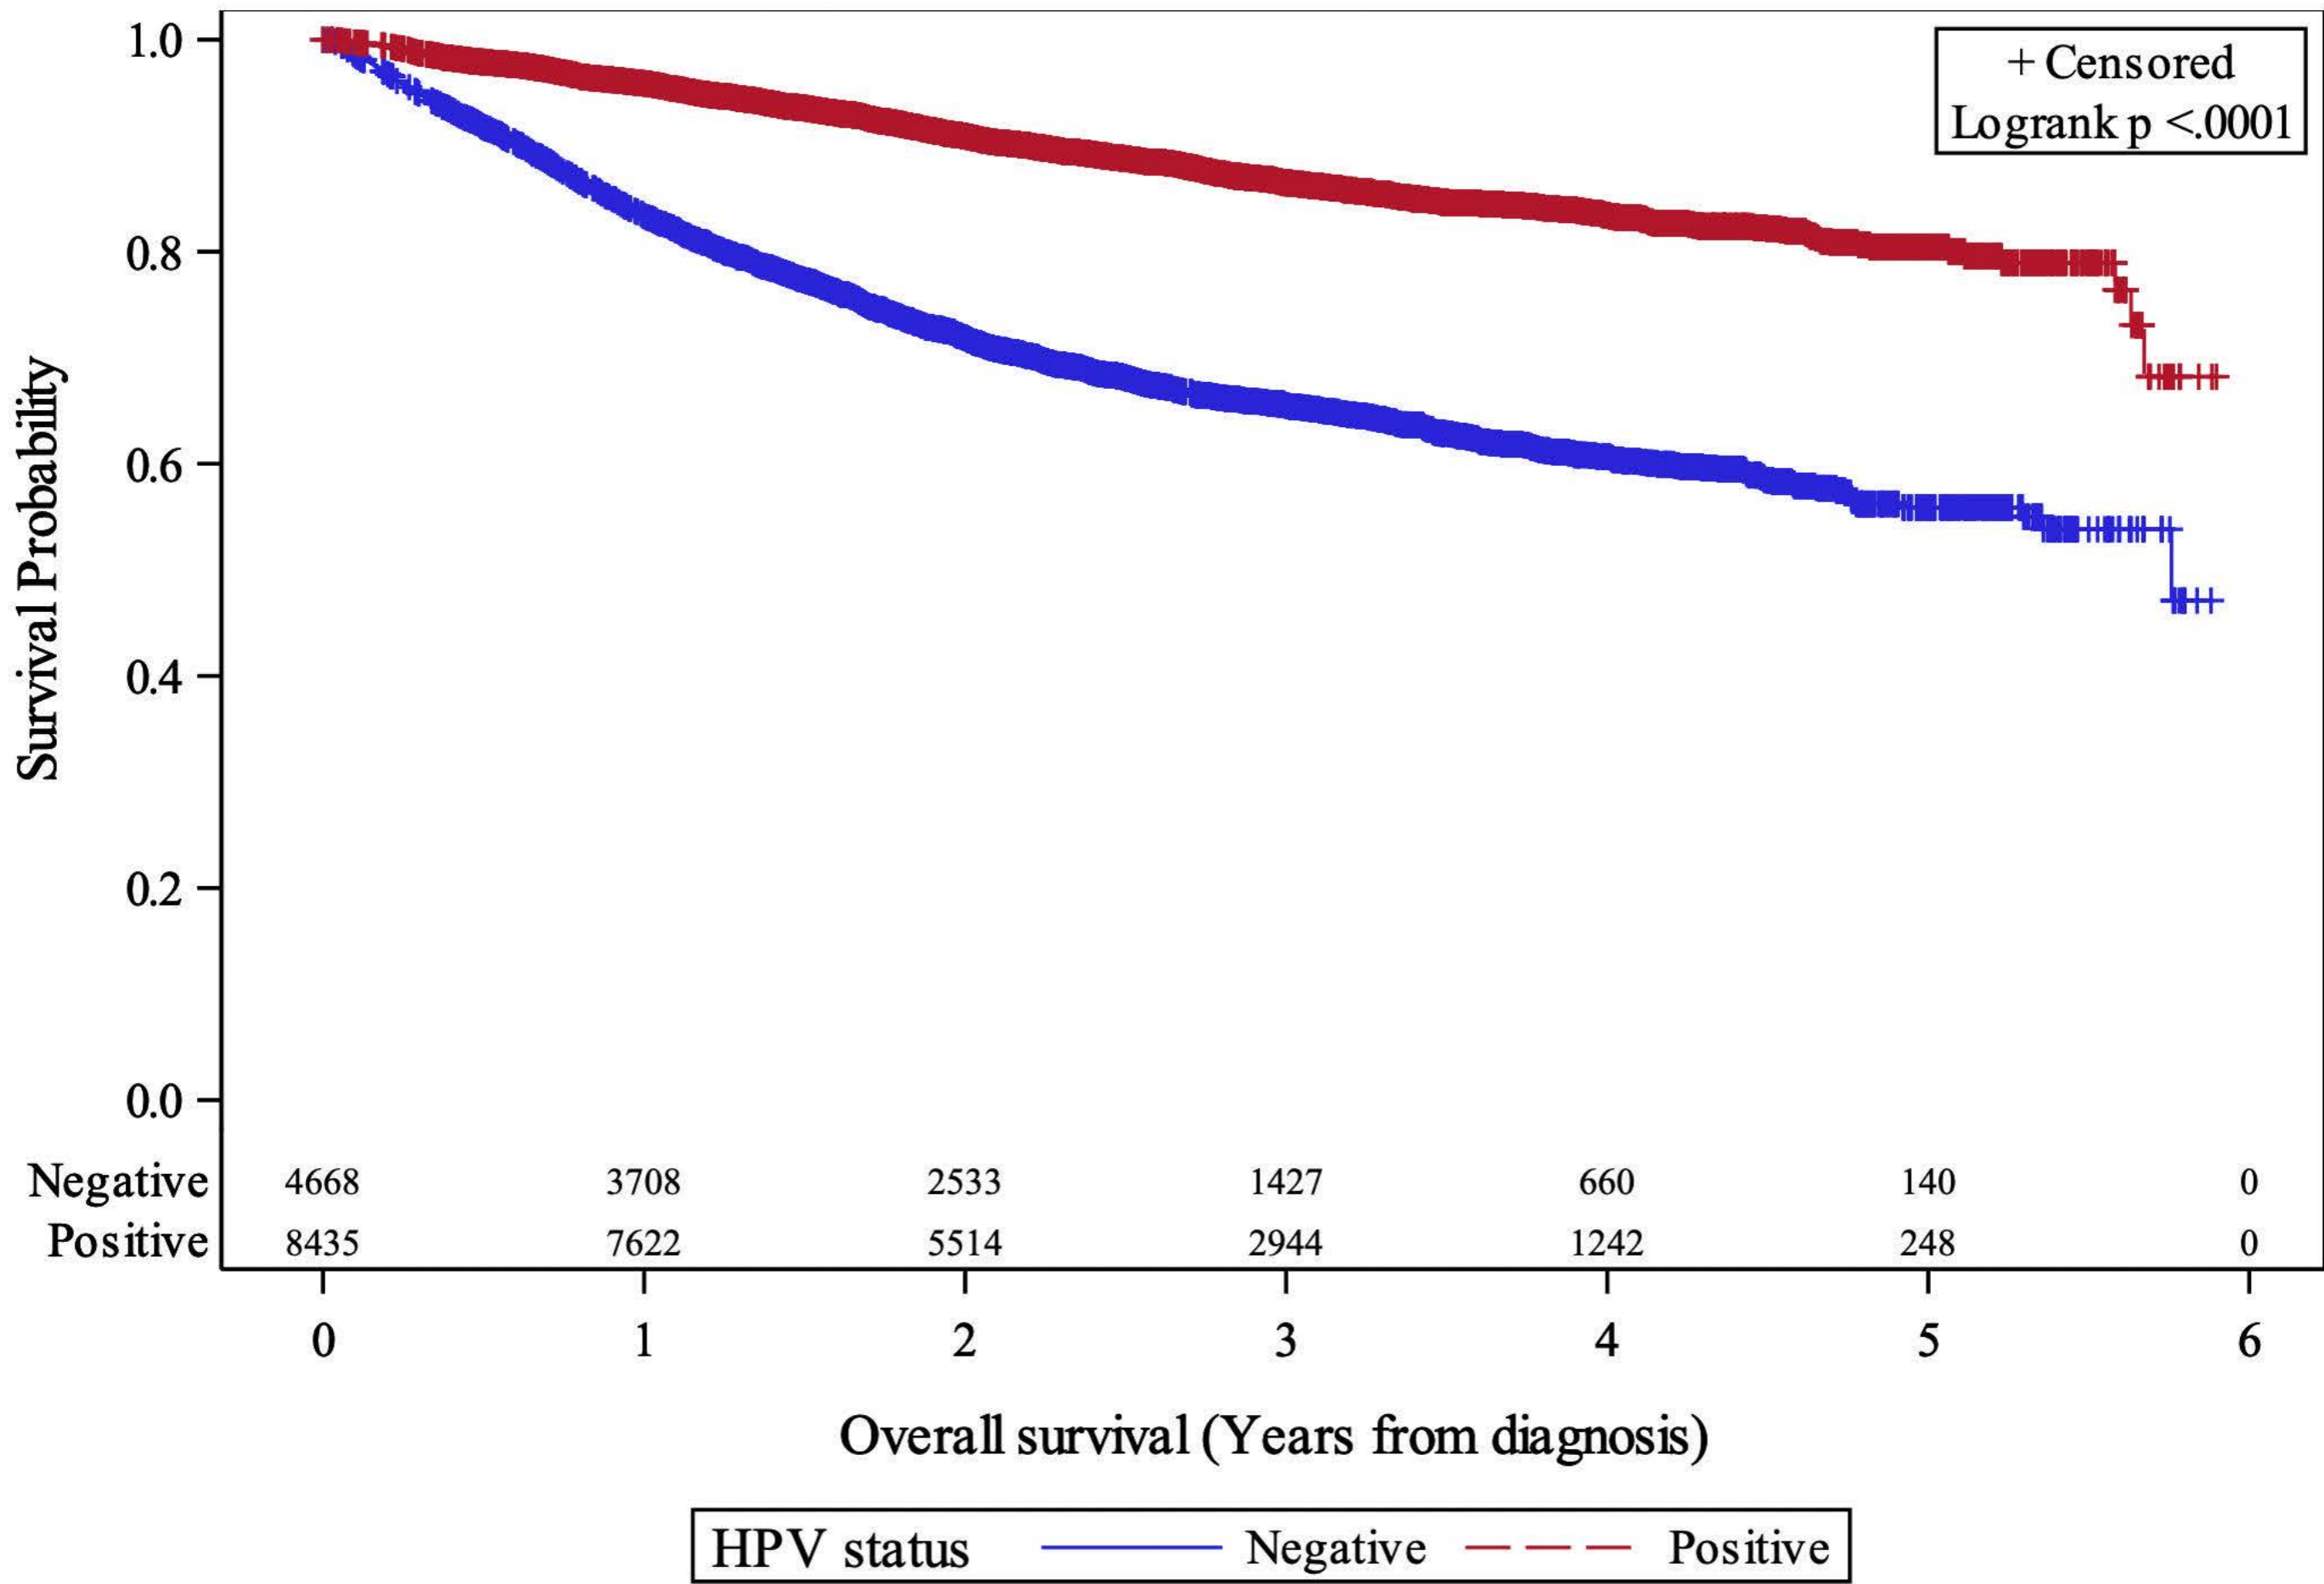

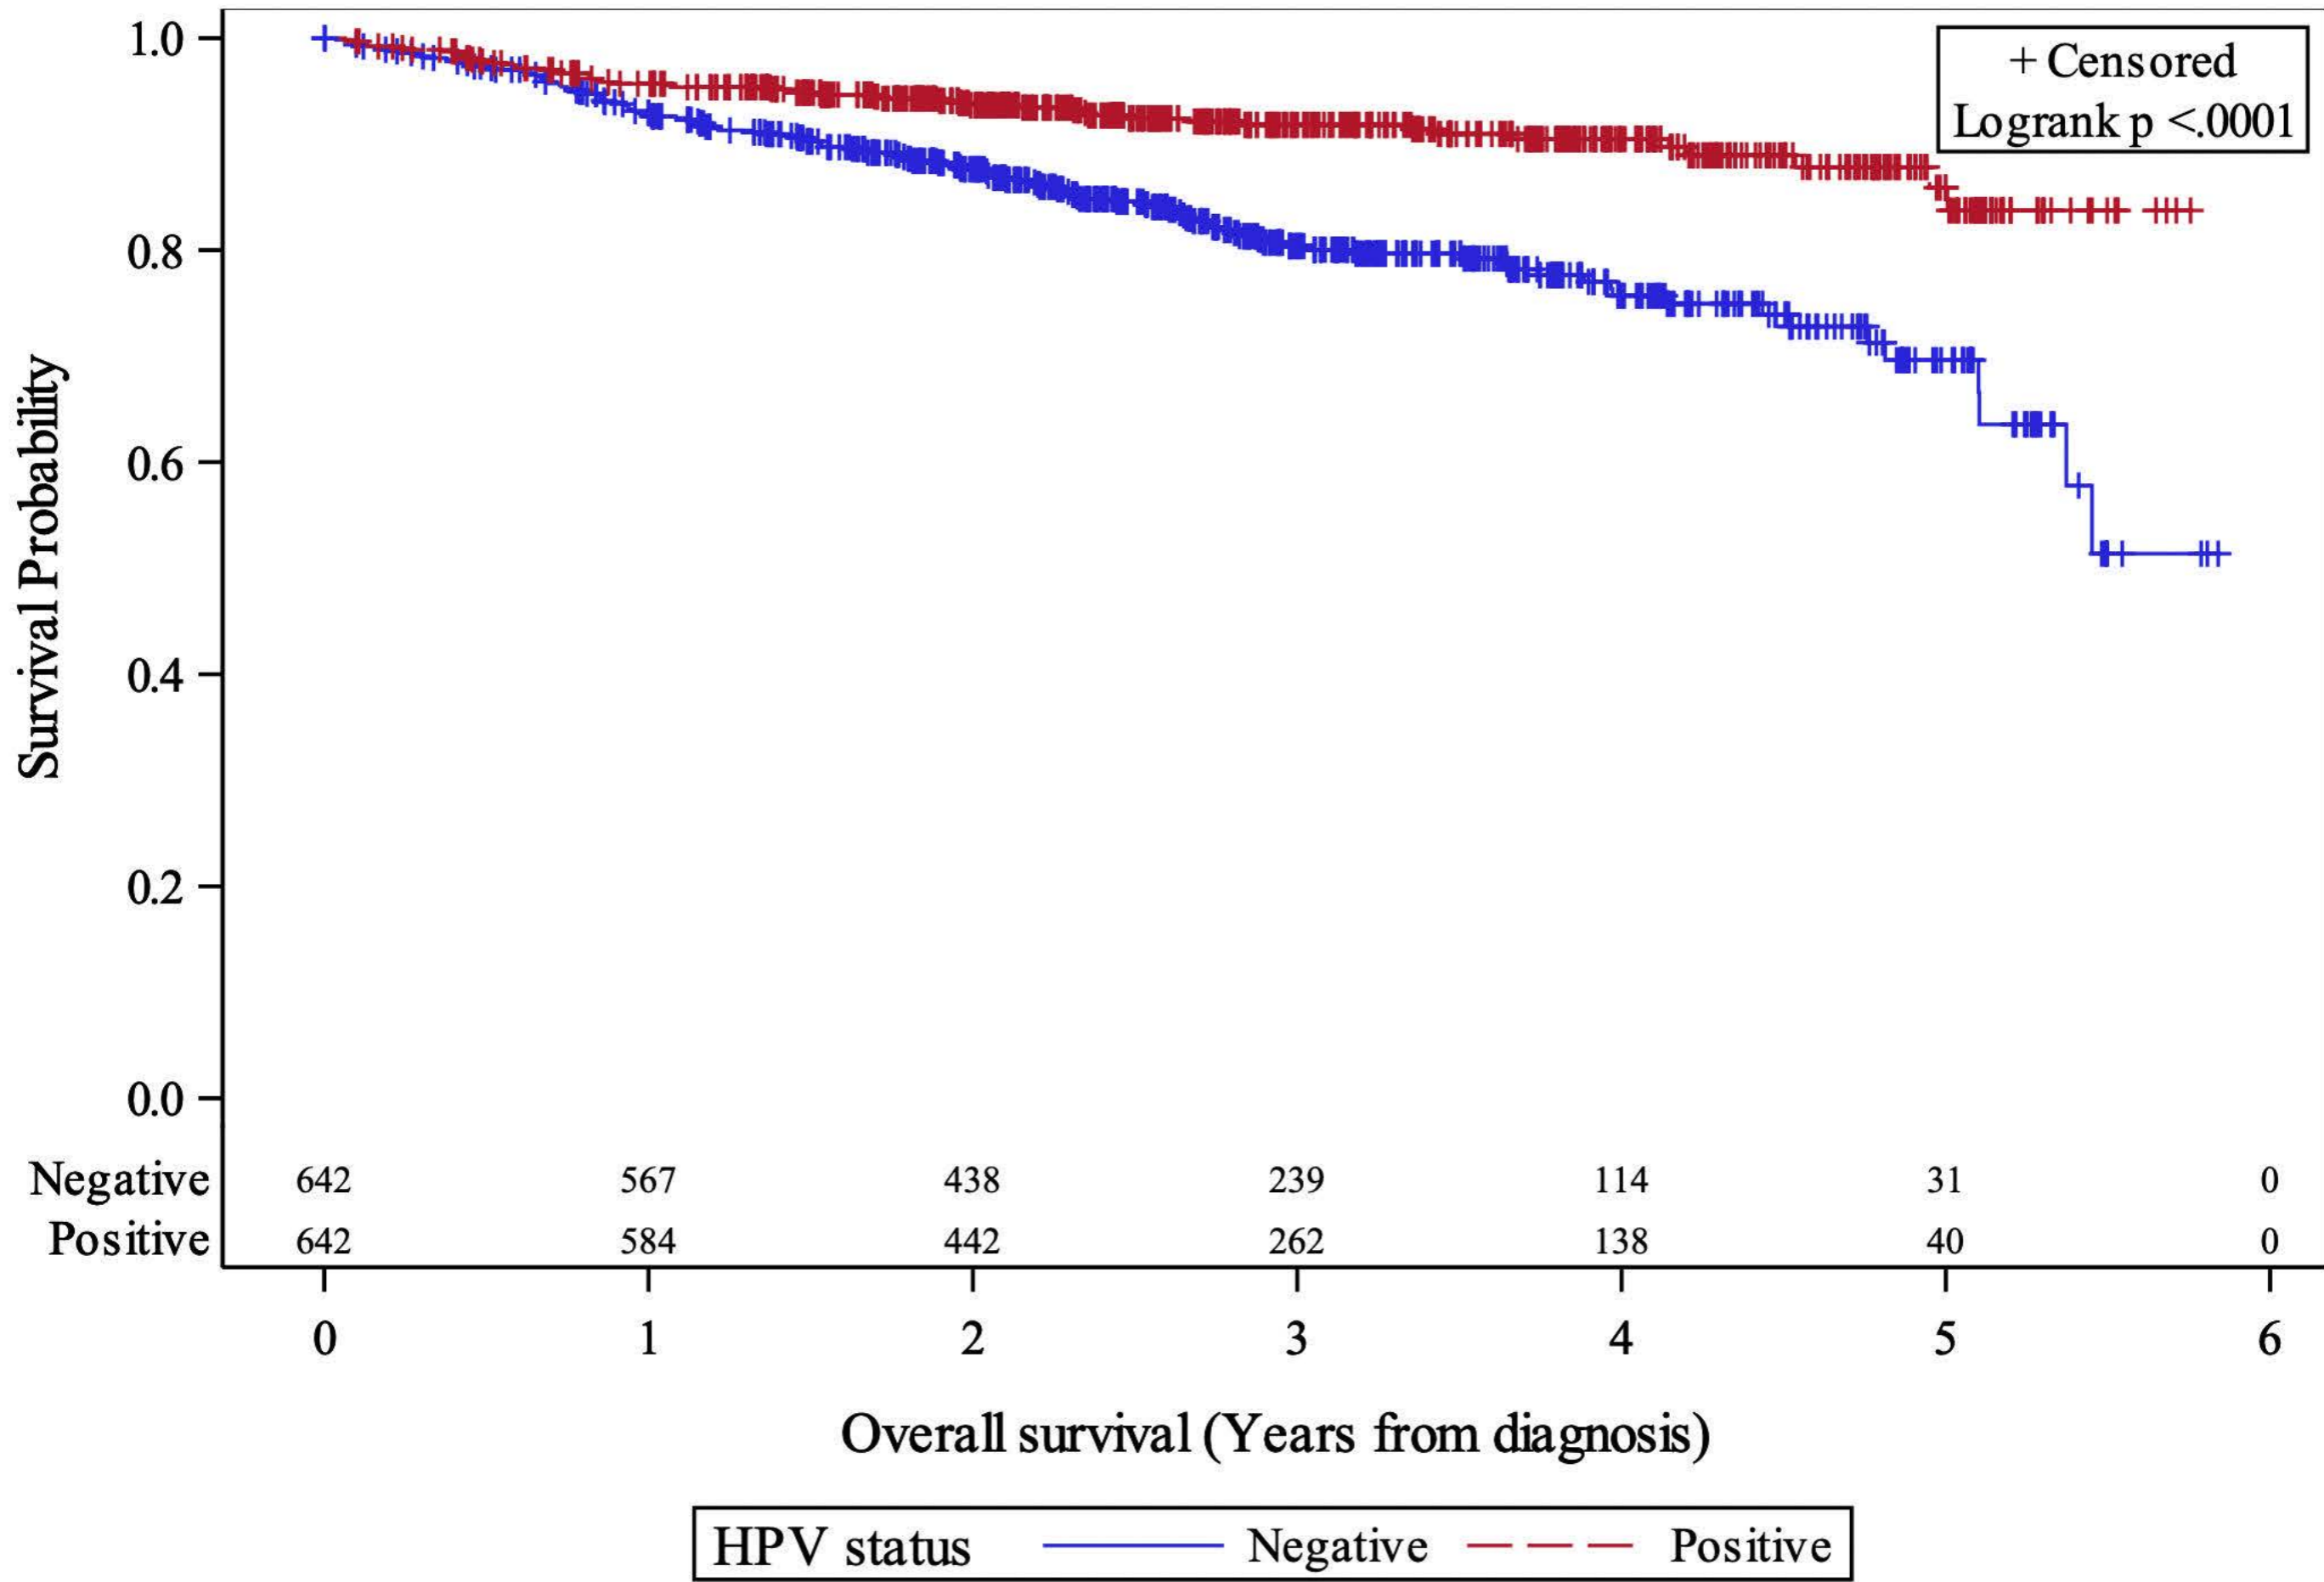

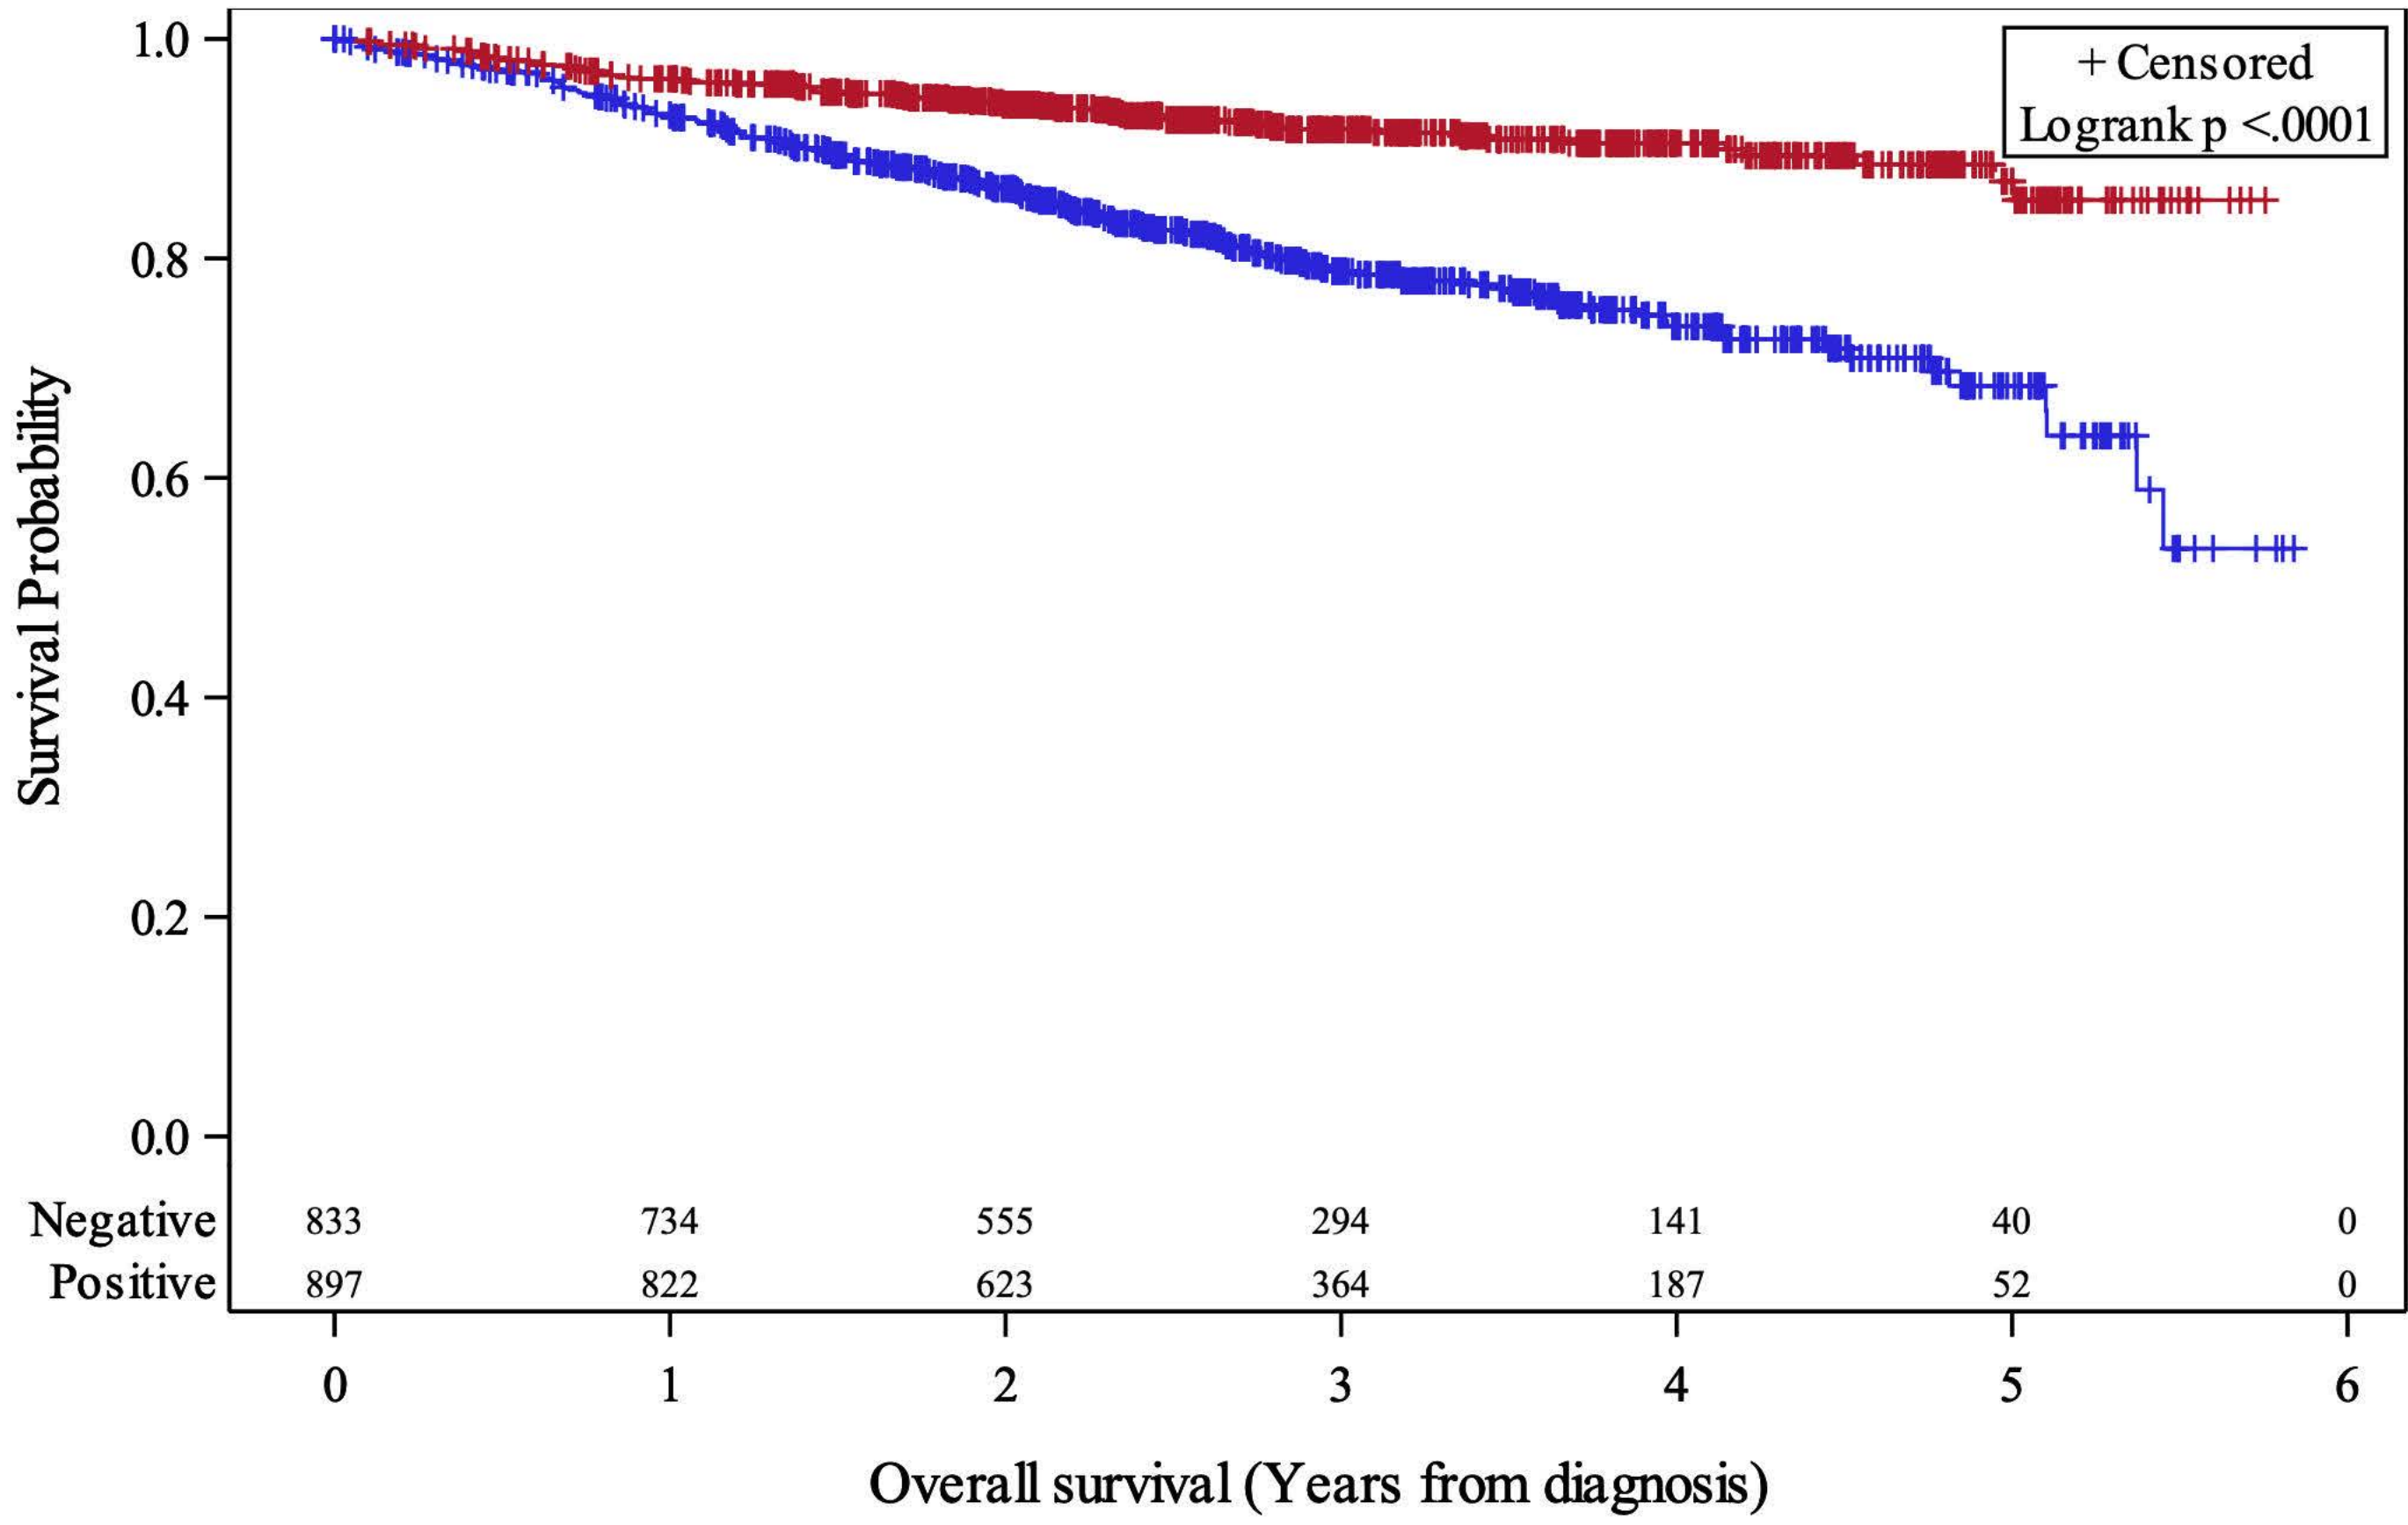

Survival Probability

Overall survival (Years from diagnosis)

HPV status — Negative — Positive

+ Censored  
Logrank p <.0001

Negative  
Positive

|     |     |     |     |     |    |   |
|-----|-----|-----|-----|-----|----|---|
| 833 | 734 | 555 | 294 | 141 | 40 | 0 |
| 897 | 822 | 623 | 364 | 187 | 52 | 0 |

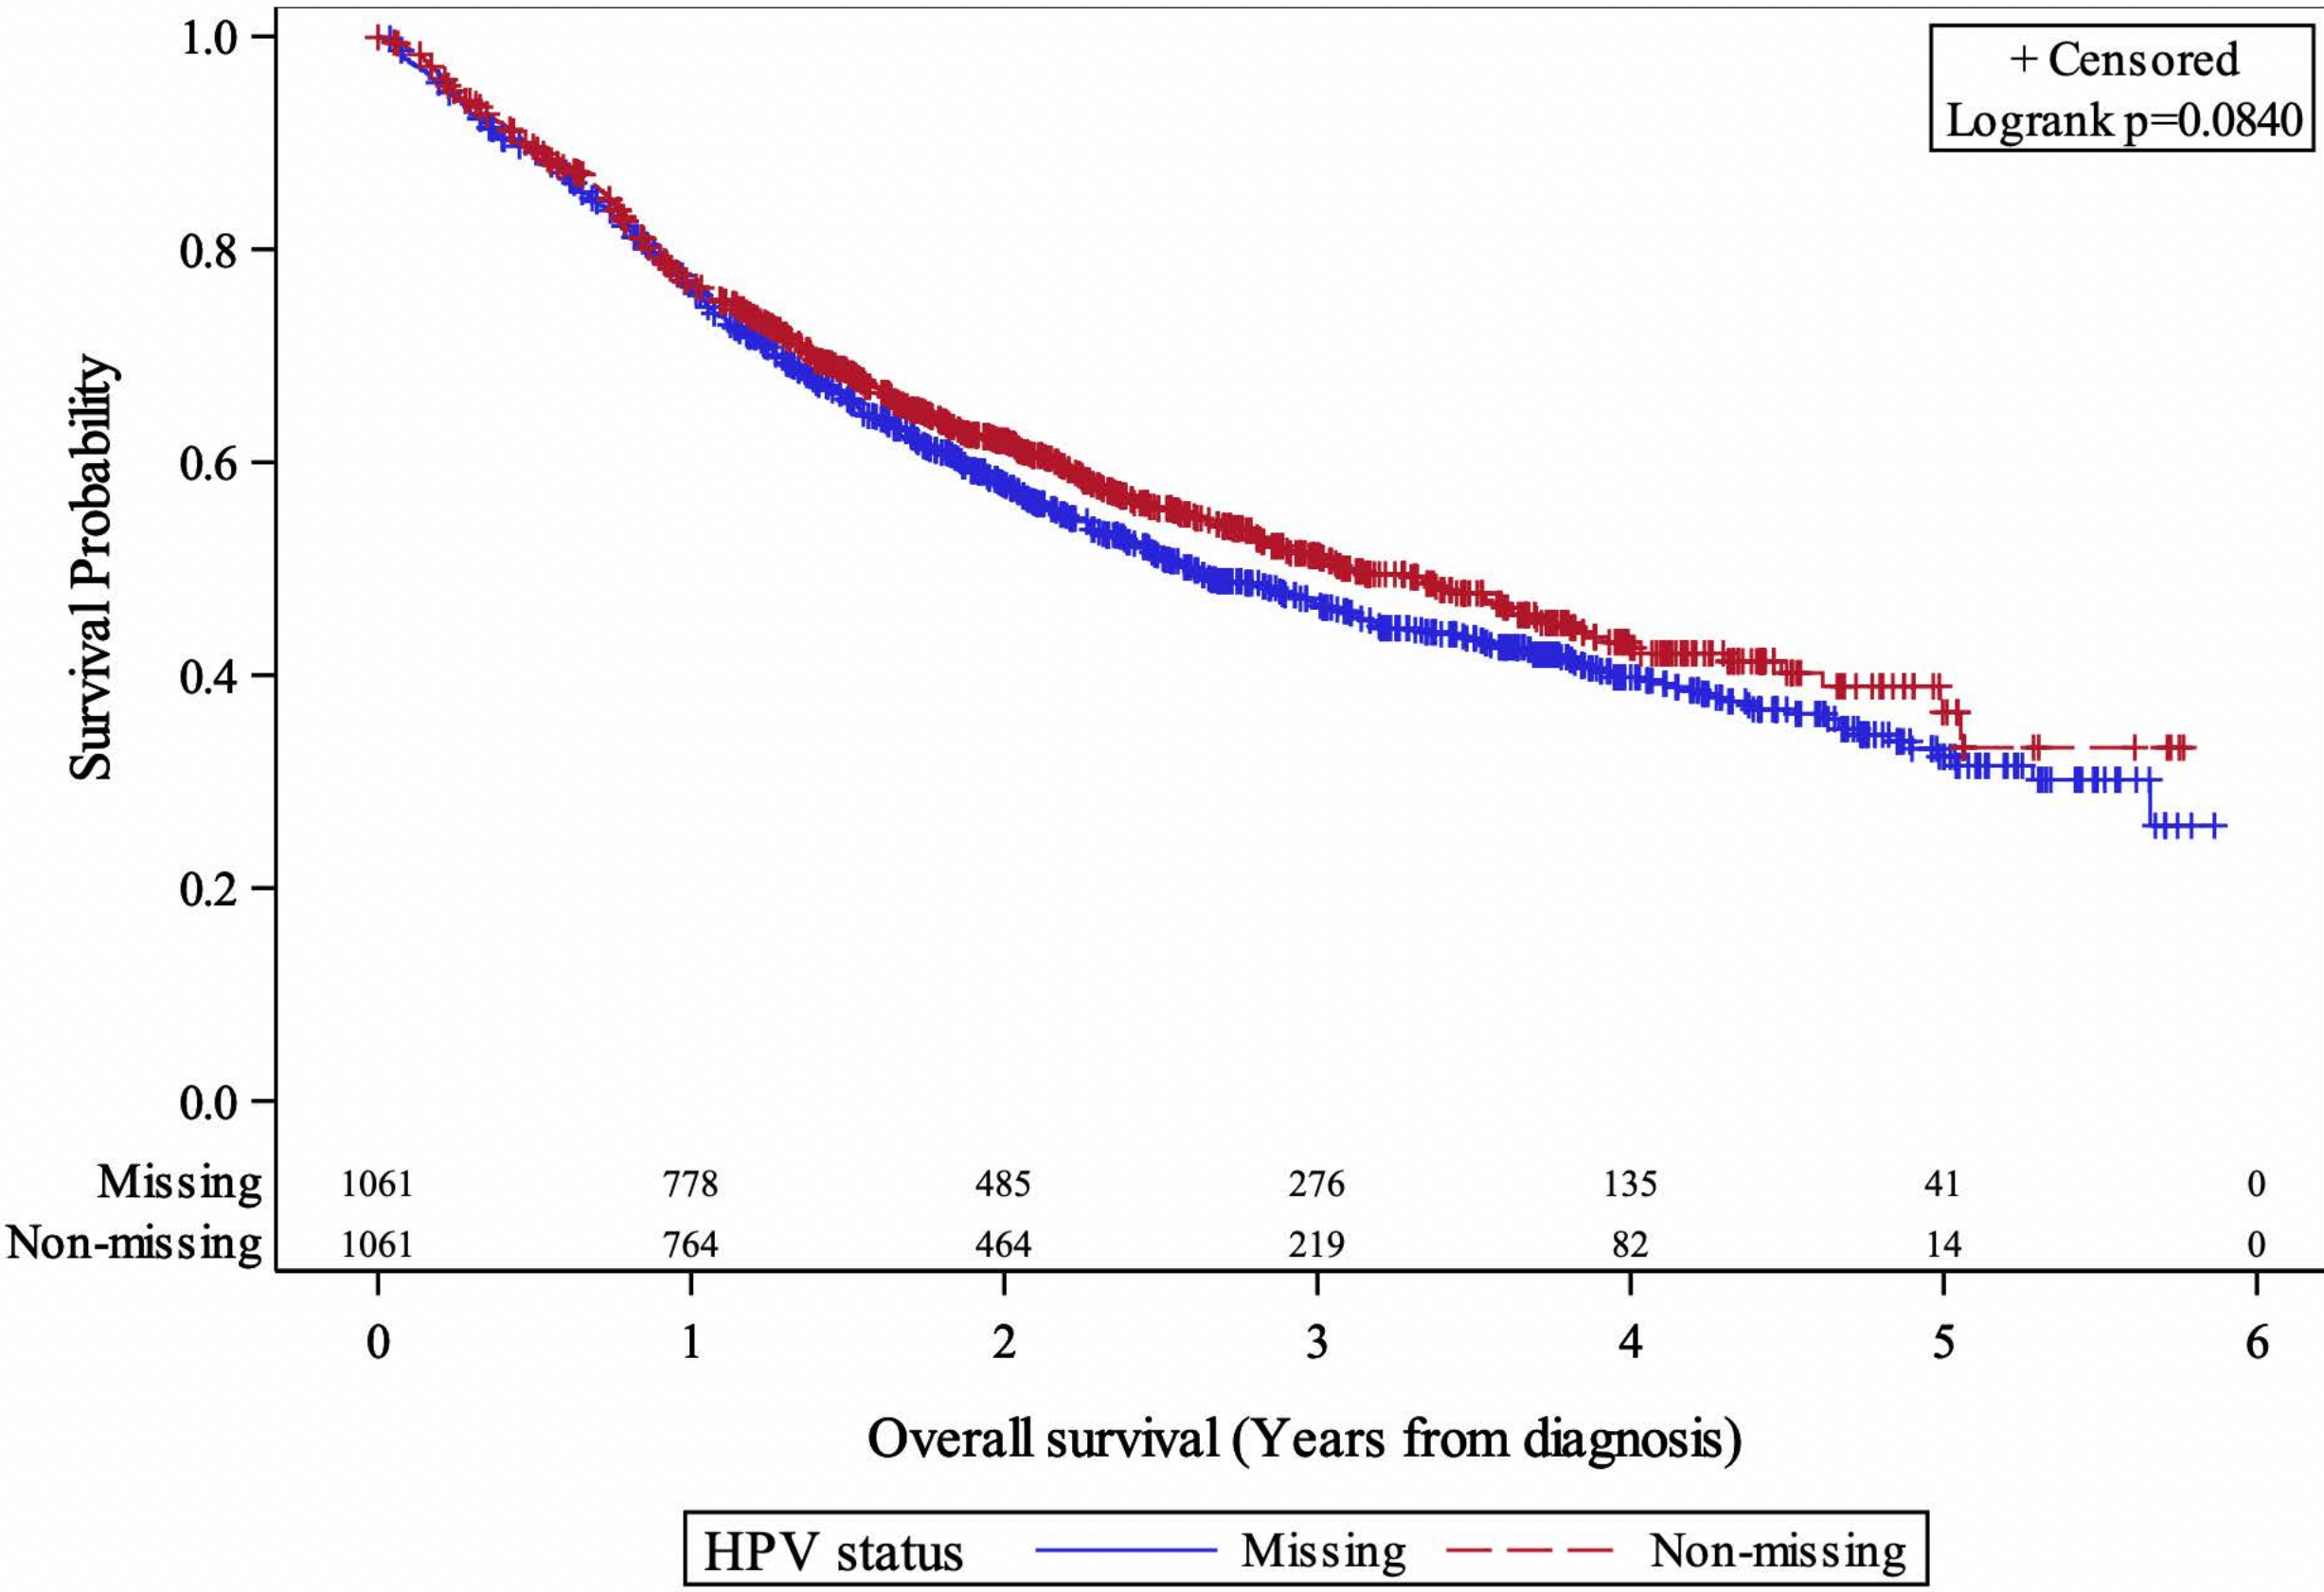

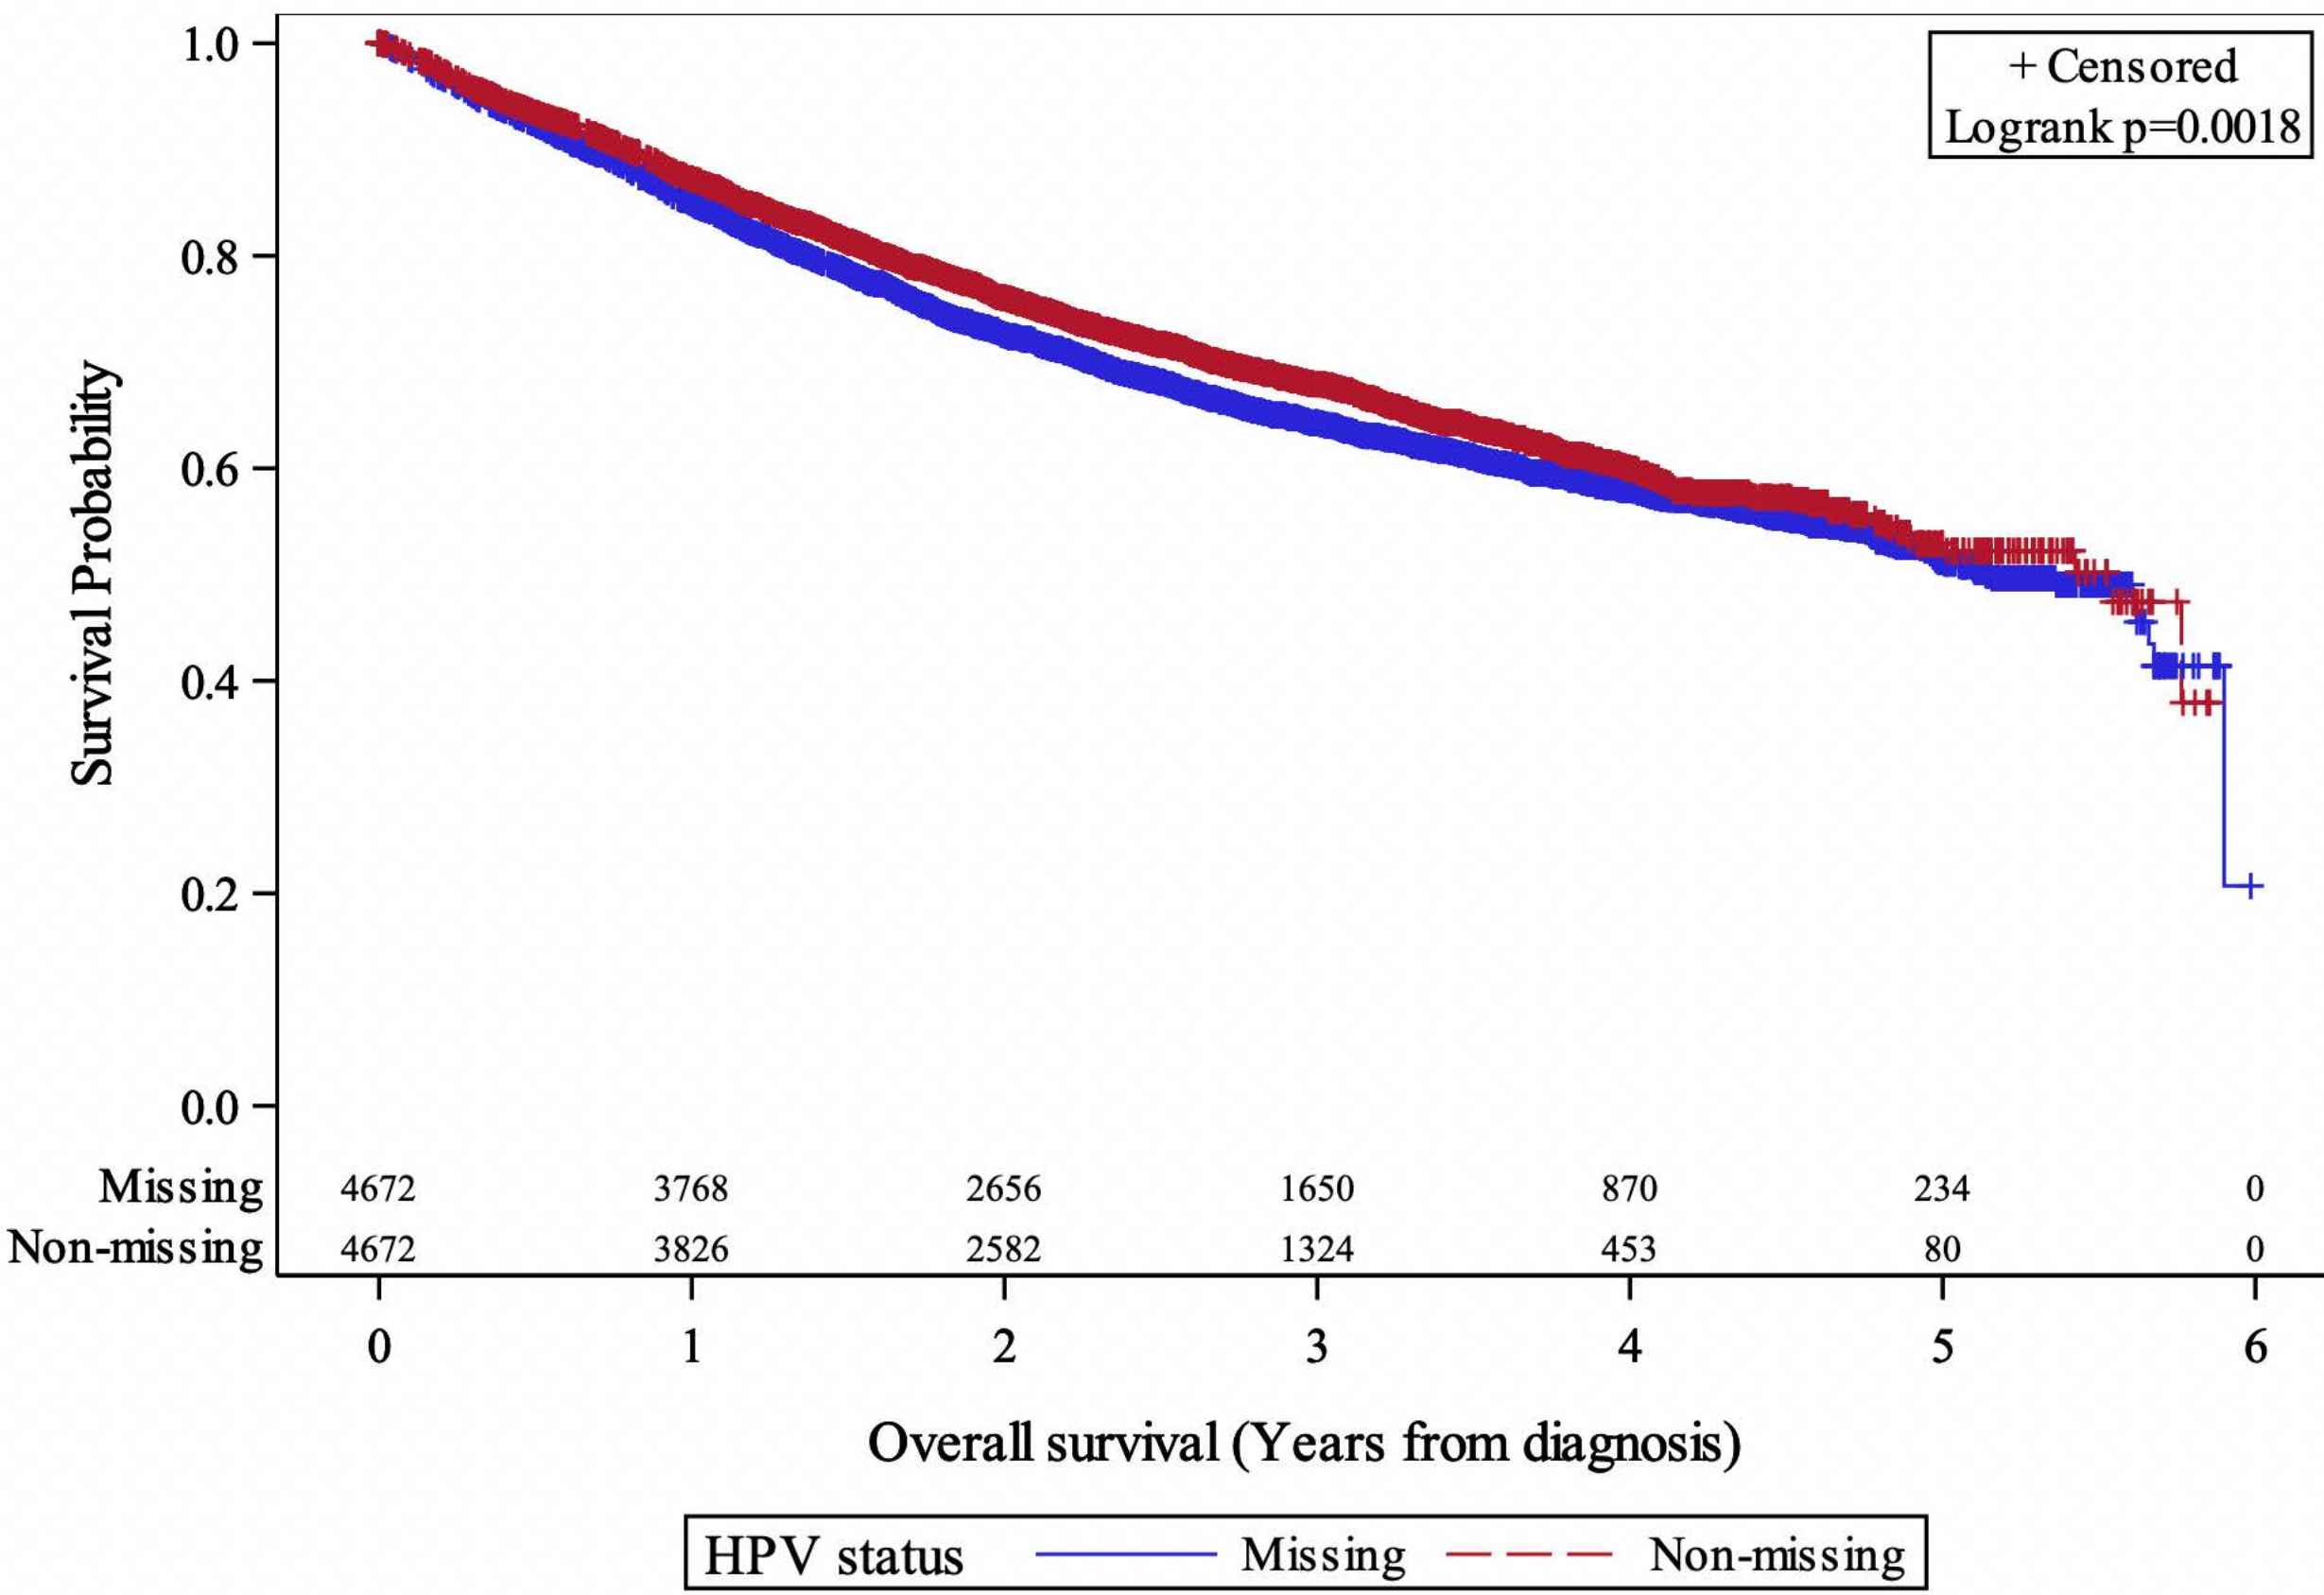



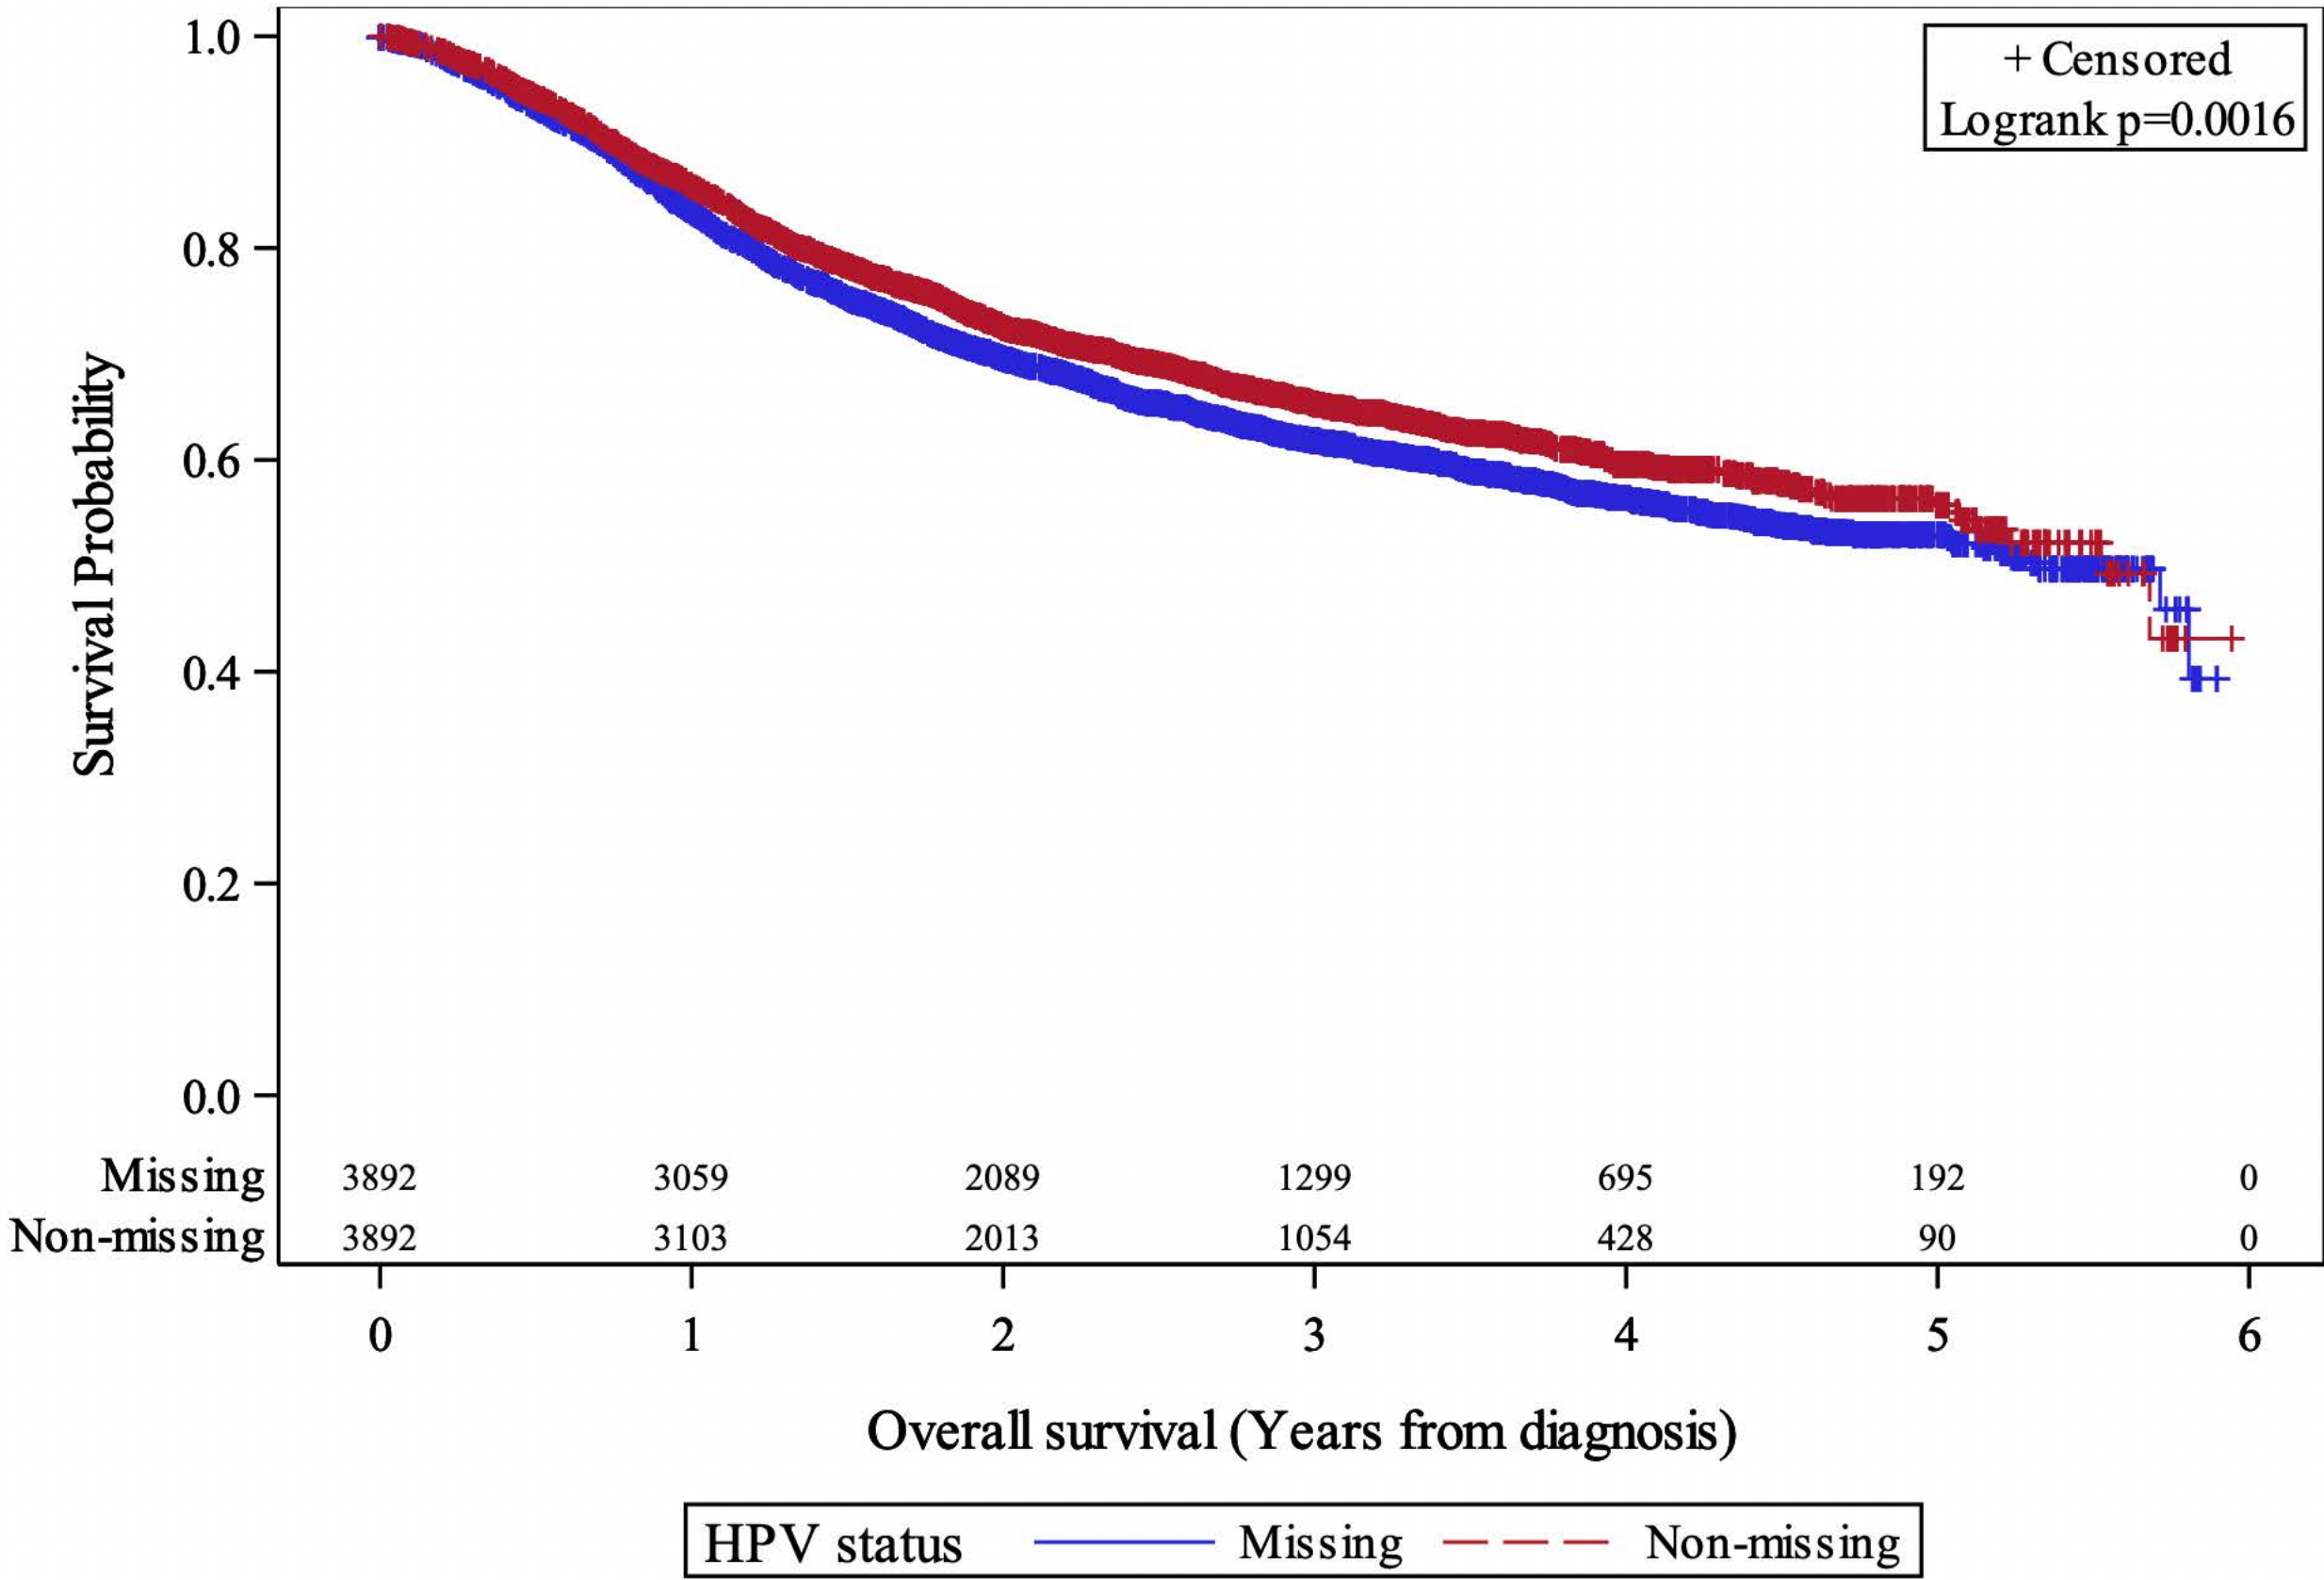

Supplement: NIHMS1018723-supplement-Supp_FigS1-14.pdf [file NIHMS1018723-supplement-Supp_FigS1-14.pdf]
